41

42

### 43 **Introduction**

44 Neuregulins (NRGs) are a family of highly pleiotropic growth factors derived from four paralogous genes  
45 (*NRG1-4*) (Figure 1A). NRGs are typically synthesized as transmembrane pro-peptides that are cleaved  
46 by metalloproteases in the extracellular space to form a bioactive peptide with an exposed epidermal  
47 growth factor-like (EGF) domain that can bind erythroblastic leukemia viral oncogene homolog (ERBB)  
48 receptors. The human *Neuregulin-1* (*NRG1*) locus, on Chromosome 8p12, generates numerous isoforms  
49 (Figure 1A, B) which are thought to be tissue-specific and functionally diverse (Falls, 2003). *NRG1* has  
50 been implicated in the development of multiple tissues by promoting cell division within the stem cell  
51 niche and in differentiation trajectories (Yu et al., 2021, Wagner et al., 2007) including progenitor cells in  
52 the gut (Jardé et al., 2020), skeletal muscle (Gumà et al., 2010, Cheret et al., 2013) and cardiac cells  
53 (Wagner et al., 2007, Kramer et al., 1996), as well as nervous system development (Birchmeier 2009,  
54 Newbern et al., 2010). These studies demonstrate *NRG1*'s key role in organogenesis and the importance  
55 of understanding how *NRG1* isoforms exert tissue-specific effects to maintain the adult stem cell niche.

56

57 *NRG1* and its receptors are involved in several diseases and targets for clinical research. Germline  
58 mutations in *NRG1* are associated with developmental brain disorders such as schizophrenia (Craddock  
59 et al., 2005) as well as degenerative disorders such as amyotrophic lateral sclerosis (Sun et al., 2020)  
60 and Alzheimer's disease (Go et al., 2005). Constitutively activated isoforms of *NRG1* are implicated in  
61 cancer, for which blocking the *NRG1* isoform Heregulin or its receptors (ERBB) are effective clinical  
62 strategies against solid tumours (Sheng et al., 2010, Zhang et al., 2022). Deficiencies in *NRG1* are  
63 associated with Hirshprung's disease, leading to poor innervation of the gut (Tang et al., 2012, Garcia-  
64 Barcelo et al., 2009), as well as abnormal brain development and mental disorders like bipolar disorder or  
65 schizophrenia (Georgieva et al., 2008, Marballi et al., 2012). In contrast, high levels of circulating *NRG1*  
66 are associated with cardiac disease and morbidity following heart failure (Haller et al., 2022). *NRG1* is  
67 also involved in modulating the immune response (Alizadeh et al., 2018, Ryzhov et al., 2017), controlling  
68 insulin related liver activity (Zhang et al., 2018), cell migration (Jumper et al., 2017) and cell-cell  
69 recognition and viability in the central nervous system (Garratt et al., 2000). Therefore, there are clear  
70 clinical benefits in understanding which cells express the different *NRG1* isoforms in each tissue and how  
71 they play their tissue-specific roles in different biological processes.

72

73 The diversity of isoform functions in healthy development and disease across different organs is mirrored  
74 by the structural diversity and tissue specific transcriptional regulation of *NRG1* products. The *NRG1* gene  
75 encodes at least 28 isoforms (Figure 1A) according to the ENTREZ Gene reference transcript list (Brown  
76 et al., 2015). Others have reported higher isoform heterogeneity from this locus (Mei 2008). This  
77 extraordinary transcript diversity is due to the use of alternate transcription initiation sites, cassette exon

78 usage, and alternate polyadenylation sequences. The locus is remarkably modular (Figure 1C), which  
79 allows for different structural combinations of NRG1 domains depending on their start site (type I-VI), the  
80 use of alternative linker domains, which are the protease targets for ectodomain shedding (1-4), the type  
81 of EGF-like domain ( $\alpha$ ,  $\beta$  or  $\gamma$ ), and whether the pro-peptide is membrane tethered or not (Figure 1C-E).  
82 One well characterized isoform type, NRG1-III, contains a unique N-terminal domain that includes a  
83 sequence that locates to the cell membrane (Nave et al., 2006). This means that upon NRG1 processing,  
84 the growth factor domain will not be released from the source cell but will function as a juxtacrine signal  
85 that allows neurons to establish key cell-cell interactions (with other neurons, oligodendrocytes, or muscle  
86 fibers) and regulates the survival of both interacting cells (Garratt et al., 2000, Wolpowitz et al., 2000). In  
87 rare circumstances, another cleavage site between the N-terminal domain and the EGF domain can also  
88 be target by a protease, releasing the EGF domain to the ECM (Fleck et al., 2013).

89

90 **Figure 1. The human *NRG1* locus.** **A)** Screenshot of the NCBI RefSeq curated products from the *NRG1*  
91 locus showing 28 protein coding transcriptional variants (NCBI Gene website accessed 26/1/2023). Left  
92 and right labels correspond to transcript and protein accessions, respectively. **B)** Representation of the  
93 *NRG1* genomic locus (Chr 8p12). **C)** Schematic annotating exons in the human *NRG1* locus with modular  
94 protein coding domains. **D)** Schematic showing combinatorial protein domains for previously annotated  
95 *NRG1* isoforms. Rows show the six major *NRG1* classes, defined by alternate N-terminals. Columns  
96 show alternate domains: domains within a column are mutually exclusive. Dotted lines show known  
97 connections between domains in different *NRG1* isoforms. Red stop symbols represent translation stop.  
98 Red arrows represent a protease cleavage point. **E)** Representation of Neuregulin protein isoforms and  
99 their domain distribution. Note that in *NRG1* types IV, V and VI all isoforms that have been characterized  
100 are transmembrane, while I, II and III also present isoforms that don't. Legend below the cell membrane  
101 describes symbols for ADAM/BACE1 cleavage site (red arrow), glycosylation site (blue chain), kringle  
102 domain (black V), IgG domain (purple circle), EGF domain (red oval), Transmembrane domain (orange  
103 rectangle), intracellular domain (grey squiggle, with or without brown triangle). N-terminal domains of  
104 *NRG1* reference modularity shown in Fig. 1B and 1C, including the membrane-tethered N-terminal of  
105 *NRG1* type III.  
106

A

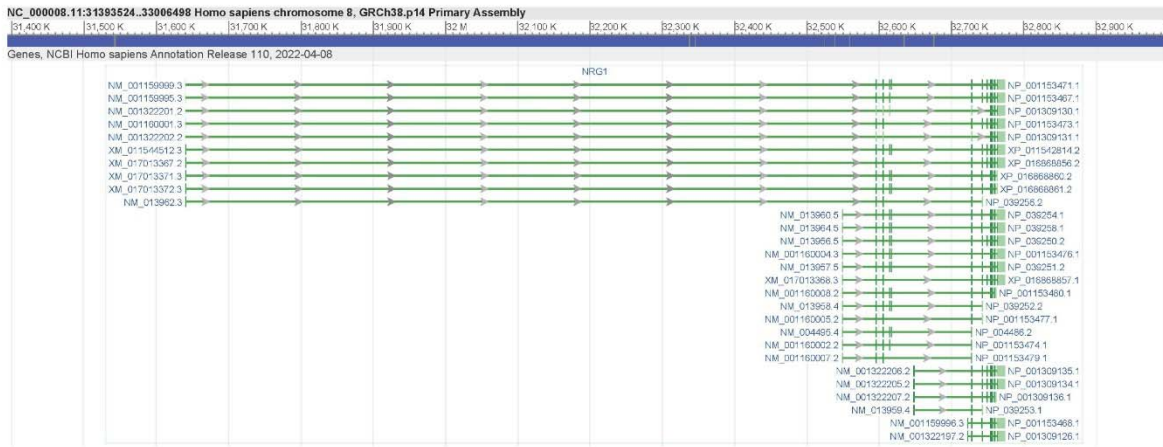

B

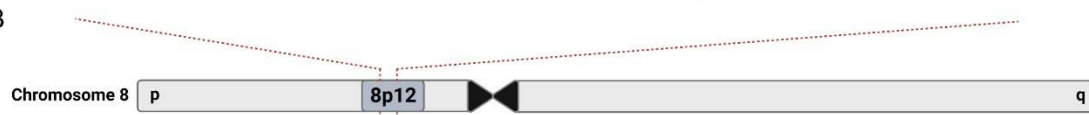

C

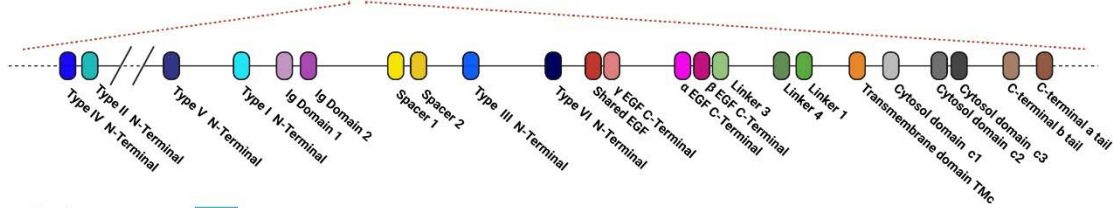

D

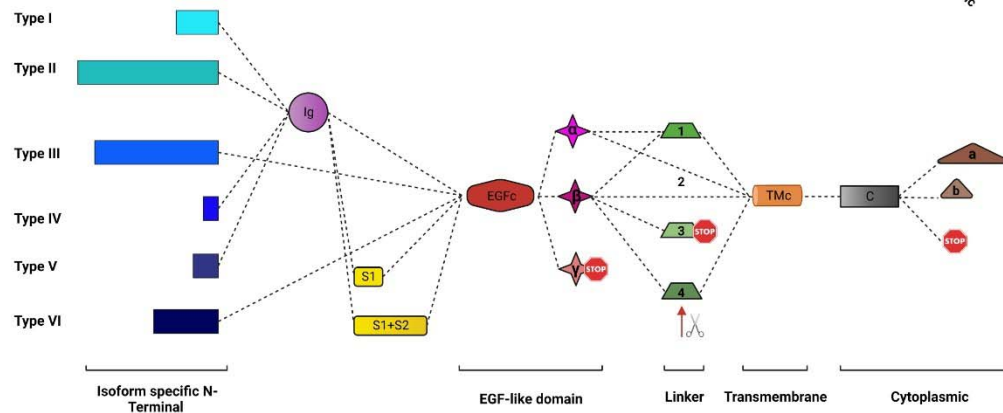

E

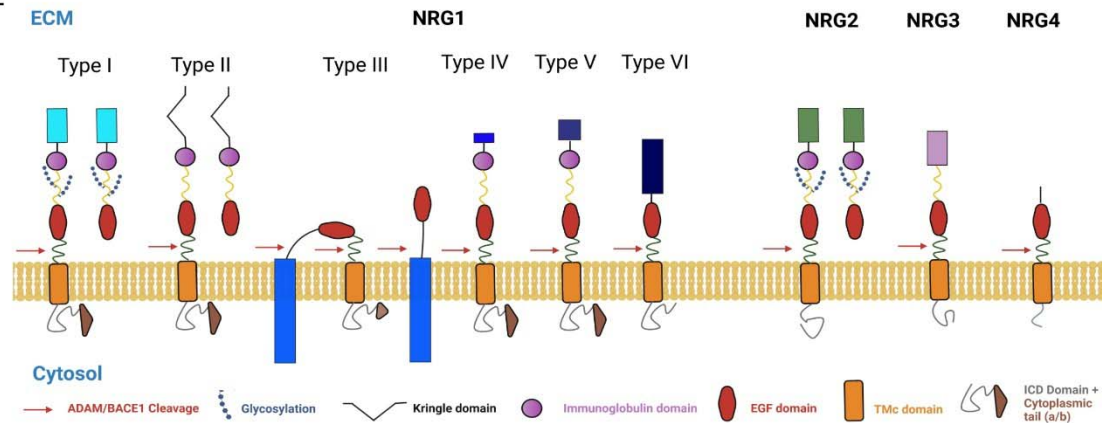

108 More recently, NRG1 has been described as an important factor regulating the stem cell niche in the gut  
109 (Jardé et al., 2020). In this context, NRG1 likely modulates stemness, proliferation and identity of  
110 progenitor cells in the niche, and it is required to recapitulate certain secretory and absorptive functions in  
111 human gut organoids (Kilik et al., 2021). Beyond development and tissue repair, NRG1 secreted by  
112 macrophages has also been implicated in inflammation (Jardé et al., 2020, Garrido-Trigo et al., 2022).  
113 However, the specific NRG1 isoforms expressed by macrophages in these contexts have not yet been  
114 described.

115

116 Determining the sources and types of different NRG1 isoforms is an important part of understanding how  
117 NRG1 directs these different developmental, reparative, and inflammatory outcomes. Here, data mining  
118 to assess the expression profiles of *NRG1* led to the identification of a previously uncharacterized TSS  
119 that appears to be used exclusively in cells of the myeloid lineage. We propose that transcripts generated  
120 from this alternative TSS belong to a new NRG1 Class, NRG1-VII. Using Oxford Nanopore sequencing,  
121 we identified eight class VII isoforms with distinct transcript structures and predicted the protein  
122 characteristics of these isoforms. qRT-PCR targeting the unique first exon of *NRG1-VII* transcripts in  
123 human cells confirmed that type VII isoforms are expressed by monocytes, infiltrating macrophages and  
124 tissue resident macrophages. Immunohistochemistry using antibodies directed towards the EGF-like or  
125 intracellular domains (ICD) demonstrated that tissue-resident macrophages are a major source of NRG1  
126 in these tissues, an observation further supported by transcriptional evidence derived from single cell data  
127 collated within the Human Protein Atlas. This study therefore contributes to untangling the complexity of  
128 this already intricate locus by characterizing the structure and distribution of myeloid-specific NRG1  
129 isoforms.

130

## 131 **Results**

132 NRG1-VII is defined by a novel TSS discovered in myeloid cells.

133 Since the different isoforms of NRG1 have varying structures and binding affinities to their receptors, we  
134 sought to investigate which of these were expressed by myeloid cells. First, we used the FANTOM5  
135 (Functional Annotation of the Mammalian Genome) database (The FANTOM Consortium; 2014), a  
136 catalogue that maps the TSSs of genes expressed in 975 human samples (including cells, tissues, and  
137 cell lines). Here, we found a previously uncharacterized TSS of NRG1 that was exclusively active in  
138 myeloid cells, including monocytes, macrophages, and basophils (Figure 2A). A schematic of the locus  
139 suggested that this represents a potential new class of *NRG1* transcripts which we prospectively named  
140 *NRG1-VII* (Figure 2). The FANTOM TSS predicted that the *NRG1-VII* starting exon contained 139 base  
141 pairs (bp) of mRNA sequence unique to transcripts originating from this site, and an in-frame methionine  
142 was identified 115 bp downstream from the start of transcription (Figure 2B, C). Therefore, we aimed to  
143 characterize whether this newly described TSS would lead to the expression of a new class of protein  
144 coding transcripts.



145

146 The TSS for NRG1-VII initiates in the intron positioned 5' of ENSEMBL exon ENSE00003743434, which  
147 encodes for part of the spacer sequence between the Ig and EGF-like domains in the canonical NRG1  
148 protein (Figure 2B). The TSS adds a 5' untranslated region (UTR) to the transcript that extends the exon  
149 from 51 bp to 190 bp (ENSE00002124728) and includes an initiating Methionine at nucleotide position  
150 115-117 bp. This newly identified TSS generates a unique 5' UTR for its transcripts. Within this 5'-UTR, a  
151 unique 20-nucleotide sequence was identified that allowed specific detection and amplification of the  
152 NRG1-VII isoforms and primers were designed to target it (Figure 2C; Table 1). Isoforms arising from this  
153 new TSS would present a unique sequence of 8 amino acids (MSYHLFFS), a type VII specific N-terminal  
154 domain. This is followed by the 17 amino acids that are commonly present in this exon in other isoform  
155 types (I, II, IV and V). This is the shortest known isoform specific N-terminal domain, and the only one that  
156 is present within an exon that other isoforms may include.

157

158 We mapped the transcriptional activity arising from this TSS and identified 2 Expressed Sequence Tags  
159 (ESTs) that had been sequenced from the 5' end (NCBI accessions BI908144 and BI907799) and  
160 originated from the *NRG1-VII* TSS. These originated from the same library (SAMN00164230) made from  
161 a pool of non-activated human leukocytes from anonymous donors. Both ESTs harbored evidence of an  
162 open reading frame (ORF) in frame with other NRG1 isoforms, but both were 3' truncated. To further  
163 validate the potential activity of this TSS we looked for evidence this isoform type was present in other  
164 mammal species. Data available from 15 non-human primate species (Pipes et al., 2013), and cross  
165 species alignment shows that the *NRG1-VII* TSS is present and highly specific to bone marrow and whole  
166 blood, while isoforms isolated from other tissues use alternate TSSs (Sup. Figure 1A). We also found  
167 transcriptional evidence of an equivalent TSS in *Mus musculus* and *Sus scrofa* derived from myeloid cells  
168 (Sup. Figure 1B-C) confirming that the class VII TSS and its expression in myeloid cells are conserved  
169 through evolution.

170

171

172 **Figure 2. Identification of a myeloid specific TSS in the human NRG1 locus. A)** Screenshot of the  
173 ZENBU genome browser showing the Gencode v22 transcript track, (accessed 26/1/23) corresponding to  
174 the FANTOM5 phase 1 and 2 TSS peaks overlapping the starting exon of NRG1 type VII. Red vertical  
175 line encased in blue dashed box indicates the position for the TSS of interest. Tag selection (grey bar,  
176 FANTOM5 CAGE track) indicates region for tag quantification in the FANTOM5 experiment table. The  
177 table is truncated to show the top 6 samples are primary myeloid cells, representative of the top 57/115  
178 samples with >1TPM) Experimental samples are ordered by highest number of CAGE tags counted in  
179 this area on sense strand (green bars, showing counts as TPM). **B)** Schematic of the human *NRG1* locus  
180 highlighting alternate transcriptional starting exons that correspond to seven isoform classes. The  
181 schematic shows 5' exon composition until the first shared exon (containing the EGF domain). Exons are  
182 numbered by ENSEMBL accessions. **C)** Alignment of mRNA and protein sequences of NRG1 type I and  
183 type VII to show an in-frame translation initiation of NRG1 type VII. Initiating methionine (M) or start codon  
184 (ATG) in red text. The blue arrow shows the target sequence of the forward primer for *NRG1-VII* mRNA's  
185 unique 5' UTR. The *NRG1-VII* transcript start is conserved in other mammalian genomes (Sup. Figure 1).  
186



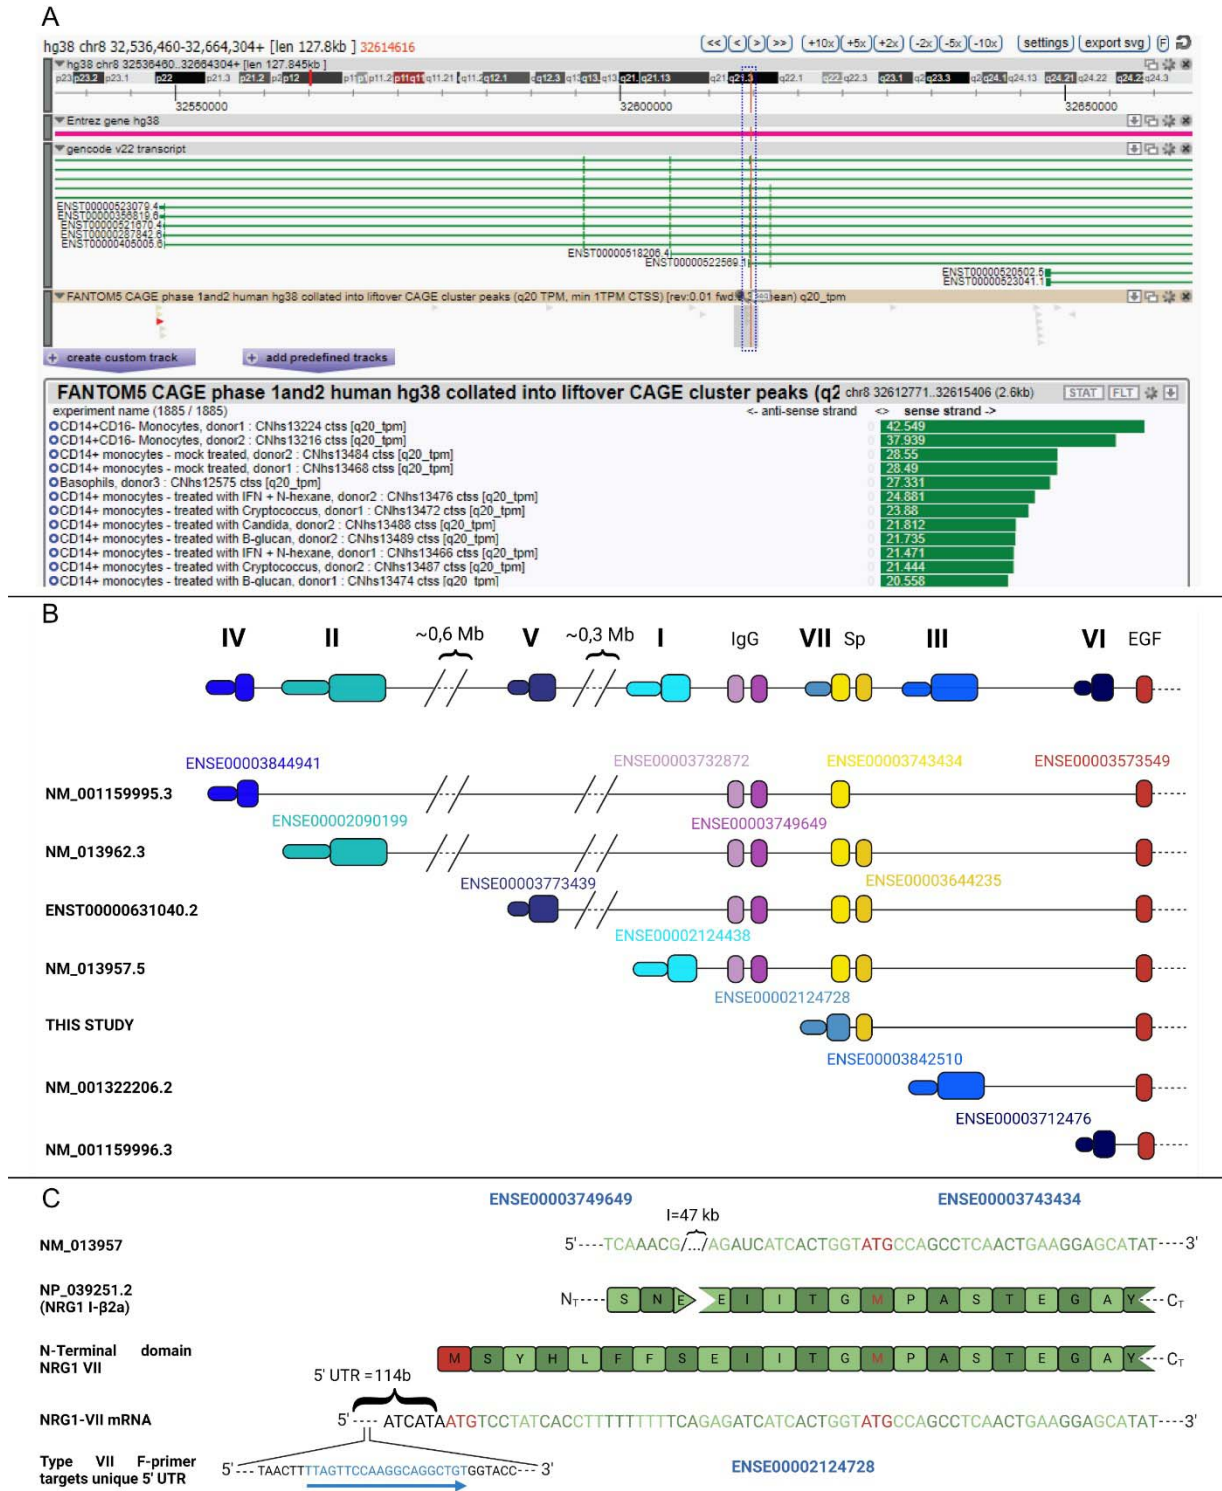



189 *NRG1-VII* TSS transcribes at least 8 distinct high-confidence transcripts in myeloid cells.

190 To characterize the diversity of *NRG1* transcripts that use the *NRG1-VII* TSS, we performed Oxford  
191 Nanopore long-read amplicon sequencing on *in vitro* and *in vivo* derived myeloid cells (Figure 3A-E). We  
192 designed a forward primer that targets the 5' UTR of *NRG1-VII* transcripts, which is unique to this class of  
193 *NRG1* and does not overlap any other *NRG1* isoform types; additionally, two reverse primers were  
194 designed to target two of the known alternative transcriptional stops that we had previously validated as  
195 active in myeloid cells through PCR (Figure 3C). We called amplicons “short” when the reverse primer  
196 targeted exon “ $\beta$ ” and “long” for the reverse primer in exon “ $\alpha$ ”.

197  
198 In total, we identified 8 novel high-confidence transcripts that were assigned at least 5% of the reads  
199 present in a sample from either the short or long amplicons (Figure 3B, D), using the IsoLamp pipeline  
200 (See Materials and Methods). Each amplicon was studied independently in *in vitro* progenitors and  
201 differentiated macrophages, and in blood-isolated monocytes. Five of these transcripts had an open  
202 reading frame (ORF) following a start codon (ATG), in frame with all other previously described *NRG1*  
203 isoforms, and no premature stop codons in early exons. We predict that these five transcripts could be  
204 protein coding (Figure 3B), including two short and three long isoforms. The three long isoforms would  
205 include a transmembrane domain (*NRG1-VII*  $\alpha$ 2a,  $\alpha$ 2b and  $\beta$ 2a) and likely undergo canonical processing  
206 through metalloproteases for the EGF-containing peptide to be released. On the other hand, the two short  
207 isoforms would lack the transmembrane and intracellular domains.

208  
209 The short isoforms were detected in all myeloid libraries and lacked the transmembrane domain (Figure  
210 3E). Of these, *NRG1-VII*  $\alpha\beta$ 3 contained both  $\alpha$  and  $\beta$  EGF-like exons, a combination that had been  
211 previously captured in refseq NM\_004495, which we now show was a truncated transcript as its TSS had  
212 not been defined. This resolves the full-length sequence of the Class VII  $\alpha\beta$  isoforms. The presence of  
213 both  $\alpha$  and  $\beta$  domains in *NRG1-VII*  $\alpha\beta$ 3 introduced a frame shift in the  $\beta$  exon, changing the peptide  
214 sequence of this isoform to a unique C-terminal end. This feature might affect the binding dynamics of  
215 these isoforms to ERBB receptors, making it of special interest.

216  
217 Monocytes expressed both short isoforms, but only expressed one long isoform, *NRG-VII*  $\alpha$ 2a. Two  
218 additional isoforms were detected in the monocyte library that we predict are sensitive to nonsense  
219 mediated decay (NMD). Transcripts *NRG1-VII* P $\alpha$ ca and *NRG1-VII* P $\beta$ 3 include a previously  
220 uncharacterized exon (Figure 3A) located in intron 2 of the other class VII transcripts. Additional support  
221 for this exon can be found in isoforms present in smaller proportions like P-  $\alpha$ 2a (Sup. Figure 2) This exon  
222 spans 111 bases (chr8:32,676,084-32,676,195). We identified this as a poison exon, as it introduces an  
223 amber stop codon (TAG), resulting in the following amino acid sequence:

224 MSYHLFFSEITGMPASTEGAYVSSSESPIRISVSTEGANTSSFITDECCHGGQYHNTAKSICLILMF-.

225

226 A third NMD candidate was identified in the iPSC-derived myeloid progenitors, NRG1-VII  $\alpha\beta$ 2a. For  
227 isoform  $\alpha\beta$ 2a, this combination introduces an early stop codon that we theorize would lead the transcript  
228 to nonsense mediated decay (NMD). All three NMD-candidate transcripts passed our high-confidence  
229 transcript filters. We manually removed additional isoforms that passed our analysis threshold but had  
230 less than 5% read coverage. These isoforms varied only in a few bases across a splice junction (Sup.  
231 Figures 2-3) and were detected in only one library and were therefore considered as likely sequencing  
232 artefacts. There are two possible exceptions: NRG1-VII  $\beta$ 2b and P-  $\alpha$ 2a. Isoform  $\beta$ 2b was detected in  
233 both iPSC derived progenitors and iMACs, and P-  $\alpha$ 2a was found in monocytes, at levels between 1 and  
234 5% (Sup. Figure 2).

235

236 **Figure 3. Sequence and structure of NRG1-VII isoforms A)** Representation of the different samples  
237 analyzed in the study and the presence or absence of the identified high-confidence transcripts in each of  
238 them (opaque = present, transparent = absent). **B)** Representation of the exon structure for 8 type VII  
239 isoforms sequenced using Oxford Nanopore long-read sequencing and their designations based on exon  
240 combinations according to the locus nomenclature. **C)** Human NRG1 locus reference with all known  
241 exons. Arrows show target regions for the single forward primer and both reverse primers used in the  
242 amplicon sequencing (See also Table 1). **D)** Predicted translation of protein sequences of the newly  
243 characterized NRG1 type VII isoforms, compared to canonical NRG1-I $\beta$ 2a (top sequence). Text colour  
244 indicates known protein motifs: purple Ig; red EGF; orange transmembrane domains. “/” represents  
245 predicted pro-peptide cleavage points (green text represents ADAM/BACE1 proteolysis, blue represents  
246  $\gamma$ -secretase proteolysis). Dashed lines in all panels represent sequences that are not shown. **E)**  
247 Schematic of predicted translated proteins for NRG1-VII isoforms compared to canonical NRG1-I (Left),  
248 borrowing from domain schema shown in Figure 1. Alternate ( $\alpha$  or  $\beta$ ) EGF domains annotated in pink.  
249 Intracellular triangles represent alternate a or b cytoplasmic tails. The yellow  $\beta$  domain represents the  
250 peptide sequence that arises from the related exon but is translated to a different peptide sequence due  
251 to a frame change.  
252

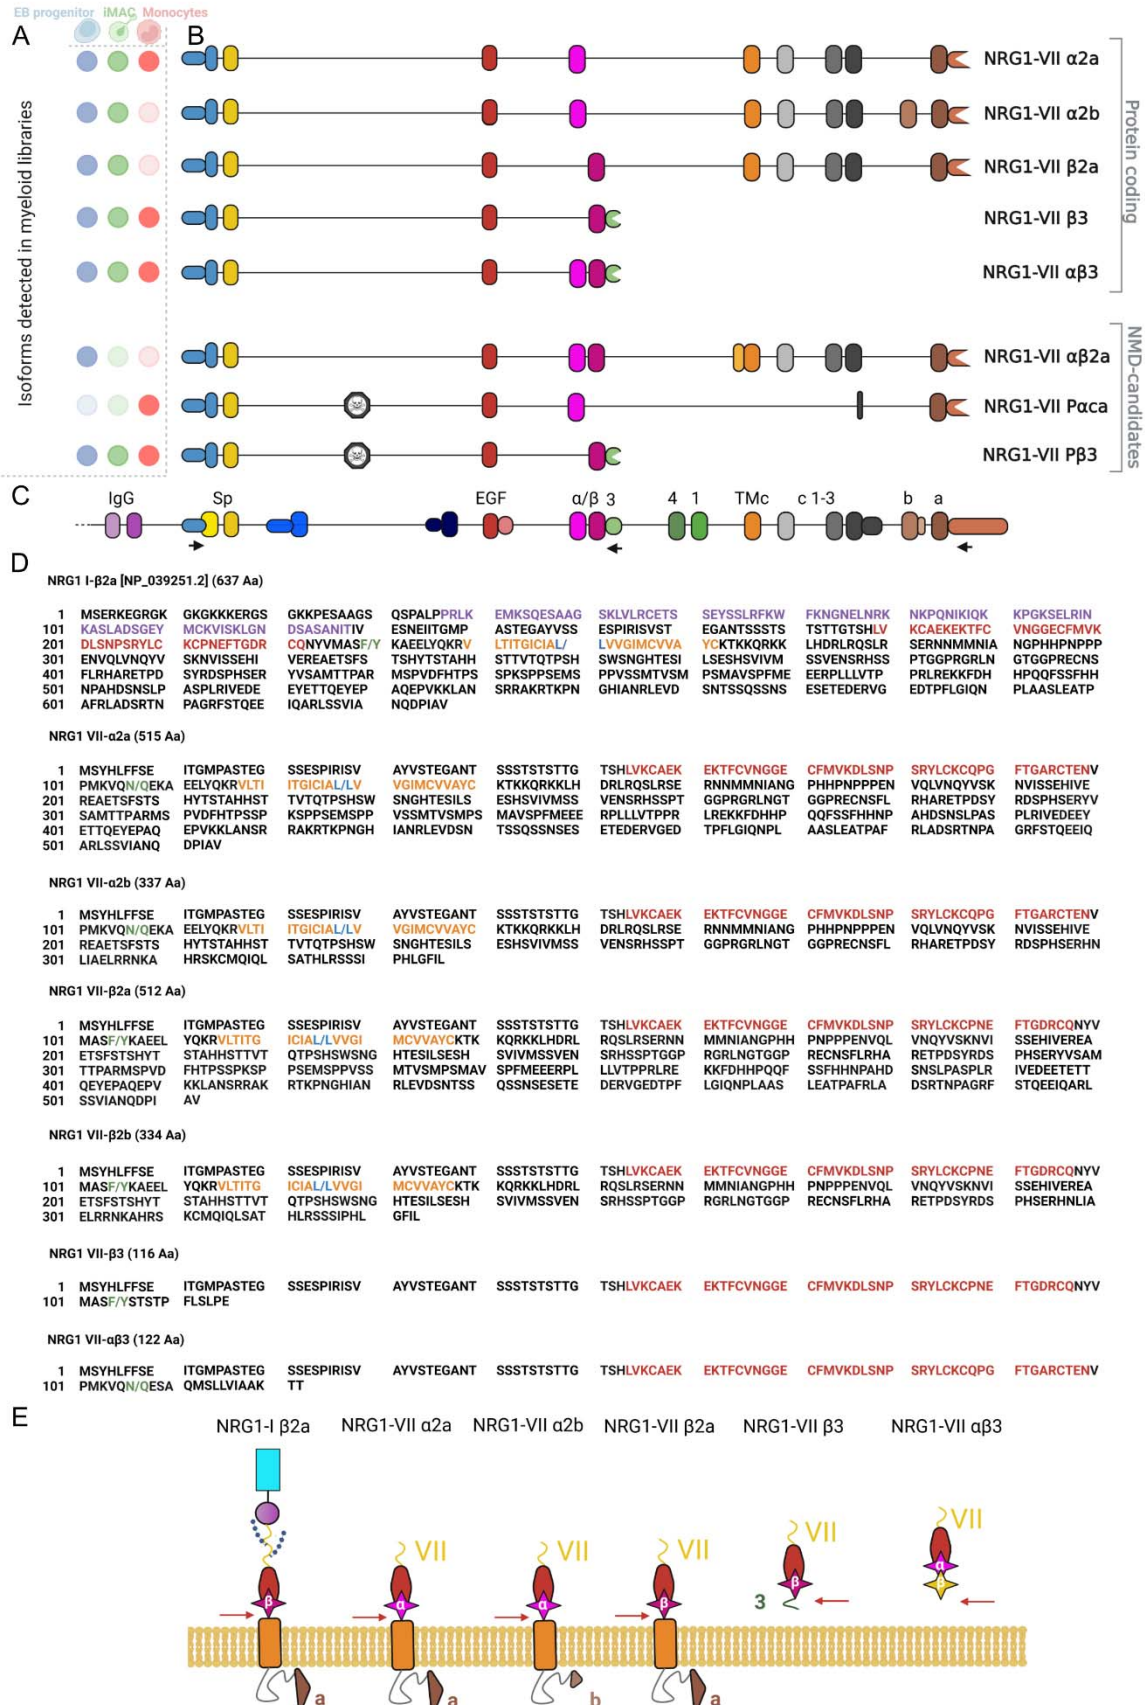

254 Macrophages are a major source of NRG1 in human tissue.

255 We next assessed the distribution patterns of *NRG1* in single-cell RNA-seq experiments in the Human  
256 Protein Atlas (Karlsson et al., 2021), which revealed that the *NRG1* locus was actively expressed in a  
257 large variety of human tissues (Sup. Figure 4). Single cell expression data revealed NRG1 activity in  
258 different cell types, such as neurons in the brain and eye; glandular stromal cells in colon, ovary, or  
259 endometrium; endothelial cells in the heart and liver; and epithelial cells in the kidney and lung (Figure  
260 4A). In most of these organs, macrophages are the main source of NRG1 (Figure 4A, Sup. Figure 4). One  
261 outstanding exception is the brain, where neurons show the highest levels of NRG1 expression in the  
262 human body. However, no isoform-specific single cell data is currently available to compare differential  
263 isoform expression between the different macrophage types present across the tissues investigated.

264

265 NRG1-VII expression in myeloid cells is affected by differentiation and maturation.

266 We sought to confirm if isoform VII is the only or even primary TSS used by myeloid cells. Therefore,  
267 using primers that could discriminate between each unique start exon (Table 1), we investigated the  
268 patterns of the seven classes of NRG1 isoforms in different *in vivo* and *in vitro* myeloid cells (Figure 4B).  
269 Expression of *NRG1-VII* was detected in all myeloid cells, and it was the isoform class showing highest  
270 expression for cells that belong to this lineage (except for macrophages derived from a 2D epithelium). In  
271 contrast, control cell types (hiPSCs and iPSC-derived cortical neurons) showed high expression of other  
272 *NRG1* classes, but not *NRG1-VII*.

273

274 Having demonstrated that our iPSC derived myeloid cells can be used to model the use of this TSS, we  
275 next investigated at which differentiation stage we could first detect the expression of NRG1-VII  
276 transcripts. Thus, we investigated the NRG1-VII expression patterns during the differentiation process  
277 towards the myeloid lineage, and its concurrence with specific myeloid markers (Figure 4C). Our results  
278 show that NRG1-VII transcription in *in vitro* derived myeloid cells follows the upregulation of mature  
279 monocyte markers like CD16, unlike what is observed in blood monocytes from *in vivo* samples (Figure  
280 4C). This suggests that the sequence of events happening *in vivo* are not recapitulated in our *in vitro*  
281 differentiation, and that a more mature myeloid identity is needed to activate transcription arising from the  
282 *NRG1-VII* TSS in these cells.

283

284 NRG1-VII expression in myeloid cells is affected by differentiation and maturation.

285

286 To confirm that *NRG1* mRNAs are translated into proteins in myeloid cells, we then performed  
287 immunohistochemical staining of NRG1 in human glioblastoma (GBM) tissue which is enriched in bone  
288 marrow-derived macrophages (Klemm et al., 2020). Myeloid cells were identified using a CD68 antibody;  
289 antibodies detecting the extracellular (EGF-like domain) and intracellular (ICD) domains of NRG1 were  
290 used. NRG1 was detected in both myeloid and non-myeloid cells (Figure 4D-E). Not all CD68+ cells



291 expressed NRG1, and those cells that did exhibit different patterns of expression (Sup. Figure 2).  
 292 Altogether, these results show that myeloid cells express NRG1 peptides in human tissues but are not the  
 293 sole contributors to the NRG1 pool in the brain. They also reveal diverse NRG1 expression patterns in  
 294 myeloid cells, which may be consistent with the different isoforms observed in our sequencing libraries, or  
 295 consistent with active processing of membrane bound-NRG1.

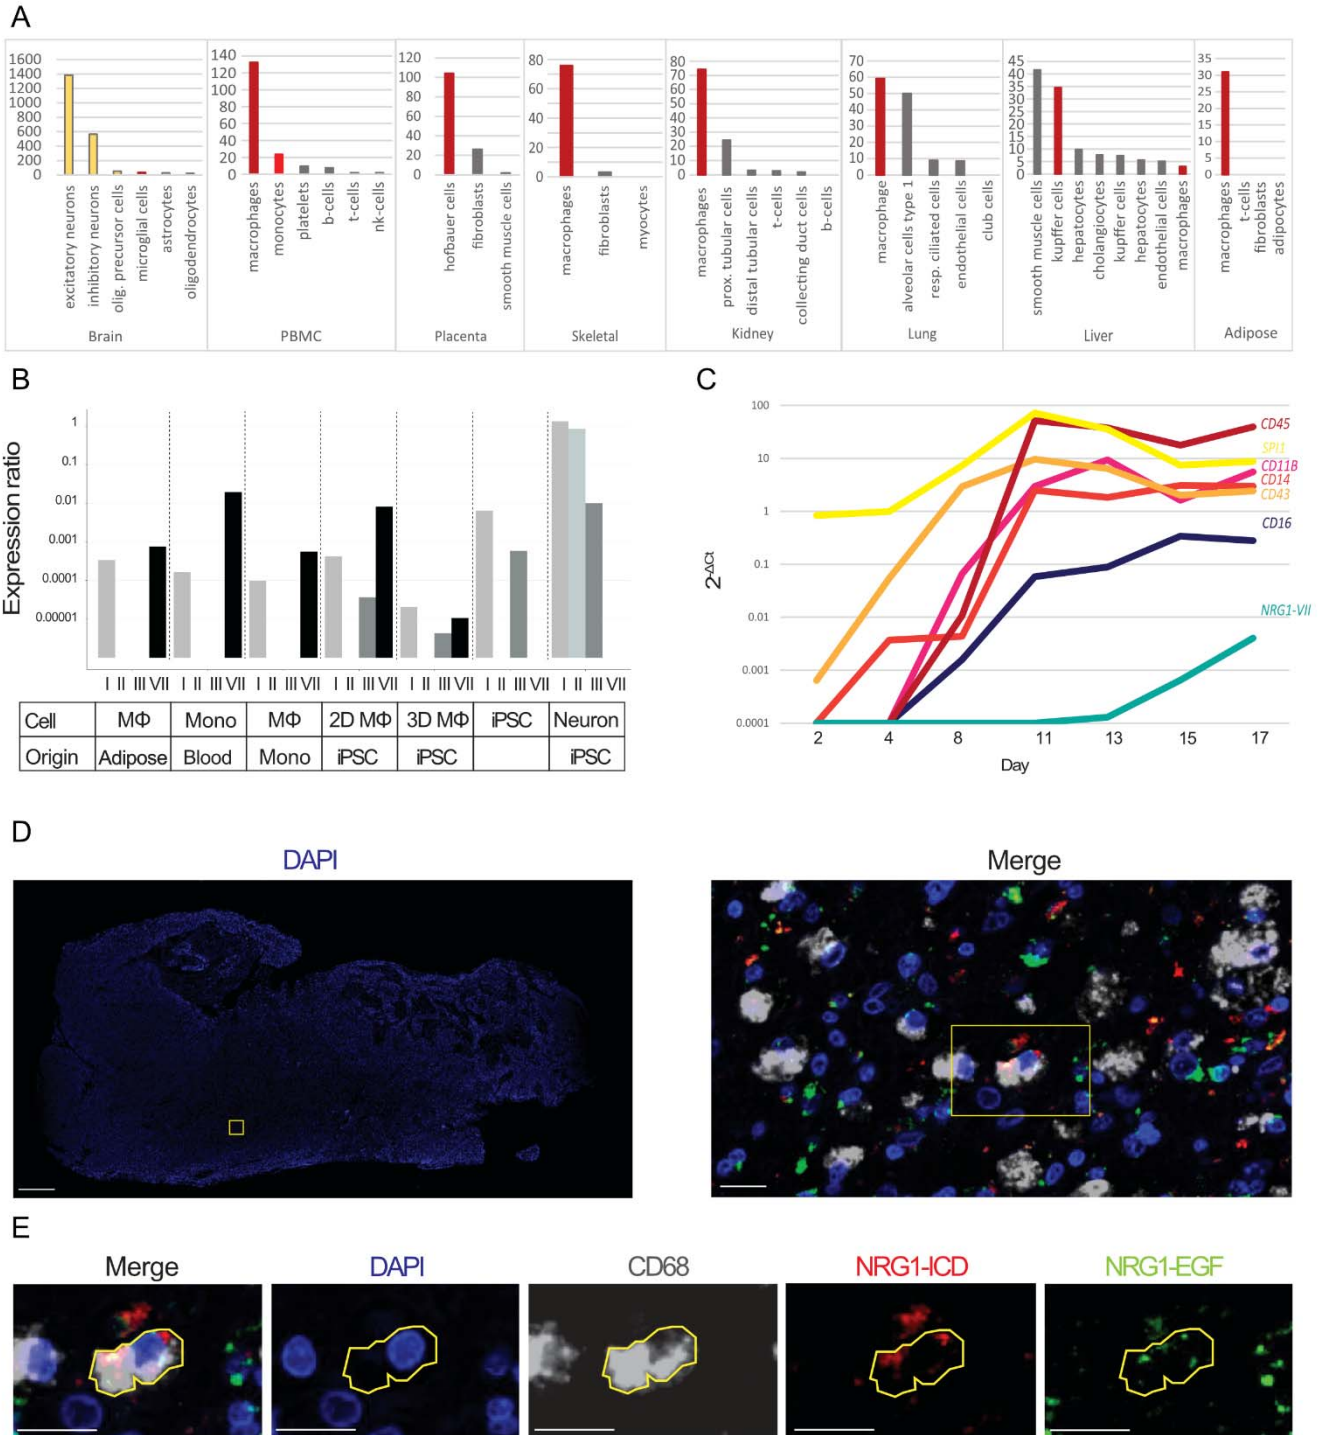

296

297

298 **Figure 4. NRG1 expression profile in myeloid cells. A)** Quantification of NRG1 mRNA expression in  
299 different human tissues according to The Human Protein Atlas (Karlsson et al., 2021). A plethora of  
300 representative tissues that express NRG1 are shown here. The y axis represents nTPM (Number of  
301 transcripts per million). Neurons shown in yellow, myeloid cells in red, other cell types in grey. **B)** qRT-  
302 PCR data measuring presence of the different NRG1 classes in different cell types. Classes IV-VI were  
303 not detected in any of the samples. Expression ratios were calculated as described in Pfaffl, 2021. Mono=  
304 Monocyte, Mφ: macrophage, iPSC: Induced pluripotent stem cell. **C)** Time series showing qRT-PCR  
305 expression of typical myeloid markers in progenitor maturation and relationship with myeloid specific  
306 NRG1-VII transcripts. **D)** Immunostaining of GBM showing presence of CD68<sup>+</sup> cells that express NRG1  
307 peptides *in vivo*. The left panel shows sample section stained with DAPI. The boxes indicate the regions  
308 shown in the right panel in D and the cell in E, respectively. Scale bar on left panel is 1 mm, scale bar on  
309 right panel represents 20 μm. **E)** Example of cell in which all markers (CD68, NRG1-EGF and NRG1-ICD)  
310 are expressed. Scale bars = 20 μm.

311

## 312 Discussion

313

314 Macrophages have been reported as a major source of NRG1 in different human tissues (Karlsson et al.,  
315 2021), including a recent report highlighting the importance of NRG1 in the developing gut (Jardé et al.,  
316 2020). Our investigation of *NRG1* expression in the public single cell atlases, including the Human Protein  
317 Atlas mRNA dataset, suggested that macrophages are a major source of NRG1 in most tissues.  
318 However, the specific isoforms involved in the macrophage mediated NRG1 secretion were  
319 uncharacterized. Here we report that myeloid cells preferentially use a novel TSS that is myeloid-specific  
320 and conserved which generates a previously uncharacterized class of NRG1 isoforms. The tissue  
321 variability and functional versatility of NRG1 are a consequence of the alternative promoter usage and  
322 exon retention that give rise to a high diversity of isoforms.

323

324 Transcripts arising from the human *NRG1* locus are differentially regulated by tissue type or  
325 developmental stage. Control over the six known isoform classes is achieved through differential proximal  
326 promoter usage at six unique TSSs, each of which is controlled by different transcription factors (Frensing  
327 et al., 2008). All available data indicates that the use of this TSS is exclusive to the myeloid lineage. The  
328 concrete mechanisms and transcription machinery involved in the process are yet to be described.  
329 Additional transcript processing can lead to alternative exon usage and define the functional modules in  
330 the protein, like the linker or the cytoplasmic tails (Figure 1 C, D), mechanisms that are tissue-specific  
331 (Wen et al., 1994). The diversity of NRG1 isoform classes and their specificity of expression in both a  
332 temporal anatomical and cell-specific manner, suggest distinct roles of different isoforms in tissue



333 patterning, especially in different brain regions (Liu et al., 2011). Further characterization of each of the  
334 NRG1-VII isoforms is hence needed to elucidate their regulation and functional diversity.

335

336 It was previously reported that the highest NRG1 expression levels in human tissues was in blood plasma  
337 (Pipes et al., 2013). This is unsurprising, as maturation of myeloid cells *in vivo* seems to cause the  
338 downregulation of this gene across the monocyte-macrophage differentiation axis (Figure 2A), with a  
339 subset of macrophages expressing NRG1 in tissues (Figure 4). Our review of the FANTOM and The  
340 Human Protein Atlas suggests that monocytes are the main source of NRG1 in blood. The function of  
341 monocyte-derived NRG1 has not yet been described, however, circulating levels of NRG1 correlate with  
342 liver metabolic activity (Zhang et al., 2018) as well as post-infarct recovery and cardiovascular health  
343 improvement (Mendes-Ferreira et al., 2013). This suggests that circulating NRG1 could play an important  
344 role in hepatic and cardiac health.

345

346 We further found that monocytes express at least five high-confidence NRG1-VII isoforms, including  
347 transcripts that contain a novel 'poison' exon (NRG1-VII P $\alpha$ ca and P $\beta$ 3) predicted to prematurely  
348 terminate translation (Figure 3A). We also note the unusual exon composition of isoform NRG1-VII P $\alpha$ ca,  
349 indicating it could be a PCR artifact; thus, further validation might be required on this isoform, despite its  
350 amplicon constituting over 15% of the detected expression. Additional isoforms containing the monocyte  
351 poison exon like NRG1-VII P $\alpha$ 2a were also found, but in much lower proportions (Sup. Figure 2).  
352 However, this supports the use of the poison exon by monocytes. This exon introduces an early stop  
353 codon and hence is likely to drive the transcript to nonsense mediated decay, generating a monocyte  
354 specific transcriptional mechanism to regulate the levels of NRG1 synthesis. Due to the high levels of  
355 expression of this gene in monocytes compared to other cell types, we hypothesize that these represent  
356 regulatory mechanisms that allow control over the levels of NRG1 expression in circulation.

357

358 Neuregulins interact with monomeric ERBB proteins (ERBB1-4), via an EGF-like domain, promoting  
359 dimerization and trans-phosphorylation of these receptors. Each ERBB monomer can bind different EGF  
360 members with differential ligand binding affinities, but only ERBB 3 and 4 can bind Neuregulins. Though  
361 NRG1 and NRG2 can bind to both receptors as monomers (Carraway III et al., 1997), NRG3 and NRG4  
362 only bind ERBB4 monomers (Harari et al., 1999, Zhang et al., 1997). Dimerized receptors can  
363 discriminate between different isoforms of NRG1, which is evidenced by differential phosphorylation on  
364 receptor tyrosine residues (Pinkas-Kramarski et al., 1998, Sweeney et al., 2000). Dimerization leads to  
365 the recruitment of different adaptor proteins, notably GRB or PI3K, which then trigger specific secondary  
366 cascades and regulate cell activity (Buonanno et al., 2001). NRG1-VII isoforms present a very short N-  
367 terminal domain compared to most other isoforms. It has been previously reported that the size and  
368 structure of the NRG1 N-terminal domain can dictate the receptor availability and recycling, affecting  
369 internal phosphorylation and internal signaling in the receiving cell (Warrant et al., 2006). Additionally, the

370 discovery of isoform NRG1-VII  $\alpha\beta 3$  as a coding isoform, adds a novel sequence possibility in the EGF  
371 domain. This is likely to determine the protein's binding dynamics and internal phosphorylation, hence  
372 changing its functional properties. Functional validation is necessary to confirm whether this isoform type  
373 has unique properties given its EGF domain structure.

374

375 NRG1 is involved in many different functions, attributed to the many isoforms which are tissue-restricted  
376 during different developmental stages. Further, while NRG1 is conserved at the protein level, the function  
377 of specific isoforms has been shown to differ between species. For example, heart trabeculation failure,  
378 which leads to a lethal phenotype in mice at day 10.5, is a phenotype common to NRG1<sup>-/-</sup>, ERBB2<sup>-/-</sup> and  
379 ERBB4<sup>-/-</sup> mice (Kramer et al., 1996, Britsch et al., 1998). Although 11 different isoforms have been  
380 identified in the heart at this developmental stage, the phenotype can be attributed specifically to the  
381 absence of  $\beta$ -RGF types I and II, which are the isoforms containing the immunoglobulin (Ig) domain  
382 (Pentassuglia et al., 2009). However, the opposite is observed in zebrafish where Ig-like neuregulin-1  
383 isoforms are dispensable for this process (Samsa et al., 2016). Thus, while essential processes in  
384 development can be attributed to specific subtypes of NRG1, differences between species showcase the  
385 need to characterize the different human isoforms using appropriate cell type and developmental models.

386

387 NRG1 and the ERBB receptors are important clinical target in different cancer types. For example, NRG1  
388 fusion proteins cause pathological activation of ERBB receptors (Laskin et al., 2020). NRG1 expression  
389 correlates with a shorter survival in patients with glioma (Yin et al., 2015), which could be related to its  
390 role in cell migration and proliferation. Glioblastomas particularly exhibit high macrophage infiltration (Wei  
391 et al., 2019). Our results show that tumor-associated myeloid cells (CD68<sup>+</sup>) may contribute to the NRG1  
392 pool seen in these tumors. Due to the lack of unique domains in type VII isoforms, the antibodies used in  
393 this study targeted common NRG1 regions (the EGF-like and intracellular domains). Even though the  
394 available antibodies lack specificity to prove that type VII isoforms are translated in this disease, the only  
395 isoforms detected in primary monocytes or macrophages in this study belong to classes I and VII.

396

397 While NRG1 double positive myeloid cells may express newly synthesized pro-peptides, we also  
398 observed CD68<sup>+</sup>/NRG1-ICD<sup>+</sup> cells indicating that the EGF-like domain had been cleaved. Alternatively,  
399 the presence of CD68<sup>+</sup>/NRG1-EGF<sup>+</sup> cells suggests that some cells restrict their expression only to  
400 isoforms that end transcription in linker 3 and lack a transmembrane domain. Therefore, we confirmed  
401 that macrophages *in vivo* express NRG1 and that there are distinct populations of macrophages in tissue  
402 based on their NRG1 expression patterns.

403

404 To determine whether *in vitro* derived myeloid cells can be used to model the activity of the NRG1-VII  
405 TSS, we used primers designed to target specific TSS usage in different cell types. We confirmed that  
406 NRG1-VII was expressed in all myeloid samples and in no others, suggesting the TSS is active. However,

407 iPSC-derived samples showed expression of NRG1-III. This could be a result of incomplete differentiation  
408 of the culture, or retention of stem cell features in *in vitro* derived myeloid cells. Moreover, the time series  
409 data obtained during the differentiation process shows that NRG1 expression follows mature markers like  
410 CD16; *in vivo*, NRG1 expression precedes CD16, and as CD16 is upregulated, NRG1 expression  
411 decreases. Hence, while we show activity of the TSS, the *in vitro* model may not recapitulate the  
412 transcriptional and maturation sequence seen *in vivo* due to the differences in the differentiation process.

413  
414 Description of a new TSS class, NRG1-VII, including at least five new protein-coding isoforms, has  
415 expanded the known NRG1 protein coding isoforms from 28 to 33. This study adds eight new transcripts  
416 that are specific to myeloid cells. However, it is likely that the full transcriptional profile of this locus has  
417 not yet been described; for example, while long-read amplicon sequencing is a sensitive isoform recovery  
418 method (Clark et al., 2020), it is limited by the primer set(s) used. Thus, only NRG1-VII isoforms utilizing  
419 linker 3 or the “a tail” regions were amplifiable in this study. It is highly likely that NRG1-VII isoforms using  
420 the 3' end present in exon c3 (ENSE00002109887) also exist, which should be validated with additional  
421 work.

422  
423 Here we showed that myeloid cells exhibit a unique regulation pattern of the NRG1 locus to generate cell  
424 specific isoforms, potentially playing an important role in diverse diseases. Only through a thorough  
425 investigation of this locus can we better understand each process and develop clinical strategies to  
426 prevent or treat the different pathologies associated with this locus. Further detailed investigation on the  
427 molecular genetic features and functions of these novel isoforms might uncover how NRG1-VII isoforms  
428 elicit differential receptor activity and downstream effects as previously described for other NRG1  
429 isoforms. This could lead to targeted therapies and an improved understanding of the complexity of the *in*  
430 *vivo* system, helping us recreate the processes in which appropriate signals are essential to model the  
431 desired biological mechanisms.

432  
433 **Materials and methods**

434  
435 Cell lines and ethics approvals.

436 Stem cell work was performed in accordance with The University of Melbourne ethics committee HREC  
437 (approval 1851831). The line of human iPSCs used was: PB001.1 (Vlahos et al., 2019), obtained from the  
438 Stem Cell Core Facility at the Murdoch Children’s Research Institute. Kolf2.1 (hPSCReg accession  
439 WTSli018-B; Welcome Trust Sanger Institute) cells were used to differentiate cortical neurons (Ethics ID:  
440 12374) and 2D macrophages. Monocytes were isolated from buffy coat, which was obtained from the  
441 Australian Red Cross Blood Service in accordance with The University of Melbourne ethics committee  
442 HREC (approval 1646608). Ethics for adipose tissue derived samples was obtained from the University of  
443 Melbourne Human Ethics Committee (ethics ID 1851533) and approved by The Avenue Hospital Human  
444 Research Ethics Committee (Ramsay Health; ethics ID WD00006, HREC reference number

445 2019/ETH/0050). For human glioblastoma samples, human ethics approval was covered by project  
446 application 1853511, approved by the Medicine and Dentistry Human Ethics Sub-Committee, The  
447 University of Melbourne.

448

#### 449 Stem cell culture.

450 Cells were cultured in Gibco™ Essential 8™ media with Essential 8™ supplement (Thermo Fisher  
451 Scientific; A1517001) on growth-factor reduced Matrigel® Matrix (Corning®; 356234) coated dishes. Cells  
452 were cultured with daily changed fresh media. Cell culture was performed in an APT.line™ C150 (E2)  
453 CO<sub>2</sub> manual incubator (BINDER; 7001-0172) in constant and stable conditions of humidity, temperature  
454 (37°C) and CO<sub>2</sub> concentration in air (5%).

455

456 Cell passaging was performed routinely when cell confluency reached (70-80%). Cells were first washed  
457 with Gibco™ PBS (Thermo Fisher Scientific; 10010023). Then, a dilution of sterile 0.5 M EDTA (Thermo  
458 Fisher Scientific; 15575020) in said PBS at a concentration of 0.5 mM was used to detach the cells from  
459 the plate. After 3-4 minutes in humid incubator conditions, cells were collected and replated with fresh  
460 media.

461

#### 462 3D iPSC derived macrophages.

463 As described in Rajab et al., 2021. Human iPSCs were differentiated into macrophages following (Joshi et  
464 al., 2019), but with the following alterations to the protocol: harvested cells were cultured in MAGIC  
465 media, which was changed as indicated in (Ng et al., 2008). During this process, cells were plated in  
466 10cm Ø non-treated Petri dishes (IWAKI; 1020-100) and placed on an orbital shaker (N-Biotek orbital  
467 shaker NB-T101SRC) in a humidified incubator with 5% CO<sub>2</sub> at 37°C.

468

469 After 11 days of culture, cells can be observed detaching from the embryoid bodies, remaining in  
470 suspension in the media as non-adherent cells (which are characterized as myeloid progenitors). When  
471 all cells are collected and allowed to settle in a 15 mL Falcon tube (Corning®; CLS431470-500EA),  
472 embryoid bodies pelleted in the bottom, but progenitors stayed in suspension in the supernatant, and  
473 could then be collected. The supernatant was then centrifuged (Heraeus Multifuge 1S-R) at 400 rpm for 5  
474 minutes to separate the progenitors from the media. Progenitors were then resuspended in a 10% dilution  
475 in volume of FBS and 100ng/mL CSF-1 (R&D Systems; 216-MC-500) in Gibco™ RPMI-1640 media  
476 (Thermo Fisher Scientific; 11875093). Cells were plated in Costar® 6-well tissue-culture treated plates  
477 (Corning®; 3516) for 4-7 days in stable incubator conditions (humid, 5% CO<sub>2</sub>, 37°C), when cells showed  
478 morphological and molecular features displayed by macrophages.

479

#### 480 iPSC derived cortical neurons

481 Kolf2.1 hiPSCs (Kao et al., 2016) were cultured under xenogenic conditions as defined in Niclis et al.  
482 (2017). The cells were then differentiated into cortical neurons following the protocol described by  
483 (Gantner et al., 2021).

484

#### 485 Human samples and cell sorting.

##### 486 *Blood monocyte isolation.*

487 Buffy Coat was obtained from the Australian Red Cross Blood Service. The blood was diluted with PBS at  
488 a 1:3 dilution and underlaid with Histopaque®-1077 (Sigma-Aldrich; Cat. No. 10771-100ml). The  
489 underlaid blood samples were centrifuged (TECHCOMP CT1SRT) at 350g for 30 minutes at 24°C with no  
490 brake. Peripheral blood mononuclear cells (PBMCs) were isolated from the interphase and washed twice  
491 using MACs buffer (Gibco™ Dulbecco's phosphate-buffered saline (DPBS) (Ca<sup>2+</sup>+Mg<sup>2+</sup> free) (Thermo  
492 Fisher Scientific; Cat. No. 14190144) with 0.5% heat inactivated Fetal Bovine Serum (FBS) (Thermo  
493 Fisher Scientific; Cat. No. 10082147 or 10099141) and 2mM EDTA (Invitrogen™ UltraPure™ 0.5M EDTA  
494 (Thermo Fisher Scientific; Cat. No. 15575020)) and centrifuging at 400g for 5 minutes at 4°C. Cell count  
495 and viability were determined using 0.4% Gibco™ Trypan Blue (Thermo Fisher Scientific; Cat. No.  
496 15250061) using a hemocytometer. Cells were centrifuged at 400g for 5 minutes at 4°C and resuspended  
497 in 40µl MACs buffer per 10<sup>7</sup> cells. Monocytes were positively selected by a magnetic field using Human  
498 CD14 MicroBeads (Miltenyi Biotec; Cat. No. 130-050-201) and LS Columns (Miltenyi Biotec; Cat. No.  
499 130-042-401).

500

##### 501 *Adipose tissue samples.*

502 Adipose tissue was obtained and processed as described in (Raajendiran et al., 2019). Myeloid cells  
503 were selected by FACS using a BD FACSAria™ III system (BD Biosciences). Cells that were positive for  
504 markers CD45 and CD11b were isolated for this study.

505

#### 506 RNA extractions and cDNA synthesis.

507 Total RNA was extracted using the RNeasy® Plus Mini Kit (Qiagen; 74134) according to manufacturer's  
508 instructions. After final total RNA elution in RNase-free water, overall RNA quality and concentration were  
509 measured using an RNA ScreenTape (Agilent Technologies; 5067-5576) in an Agilent 2200 TapeStation  
510 System (Agilent Technologies; G2964-90003).

511

512 cDNA synthesis was then performed using the isolated total RNA and considering the concentration  
513 values assigned to each of the samples for the coming steps. cDNA was synthesized using  
514 SensiFAST™ cDNA Synthesis Kit (BioLine; BIO-65053) and following all protocol specifications from the  
515 vendor. cDNA concentration and quality were checked using a D5000 ScreenTape (Agilent Technologies;  
516 5067-5588) in an Agilent 2200 TapeStation System. Final cDNA samples were then stored at -20°C.

517





538 NRG1-VII was amplified using the LongAmp® Taq 2X Master Mix (New England Biolabs; Cat #: M0287S)  
539 and the specified primers (Table 1) for either 30 cycles for the shorter amplicon or 40 cycles for the longer  
540 amplicon. The samples used were a pool of monocytes from 3 different blood donors, a pool of myeloid  
541 progenitors derived *in vitro* and macrophages differentiated from said *in vitro* derived progenitors. Target  
542 sequences were then amplified using specific primers (Table 1) and purified using AMPure beads  
543 (Beckman Coulter; A63880) at concentrations appropriate to each of the target sizes. Then, 2 ng of  
544 purified cDNA from each sample were barcoded following the EXP-PBC096 protocol from Oxford  
545 Nanopore Technologies. Samples were pooled (equimolar) and a sequencing library was prepared as  
546 described in the SQK-LSK110 Oxford Nanopore protocol. Samples were then loaded on a Flongle flow  
547 cell (FLO-FLG001) and sequenced using a GridION device.

548

#### 549 Sequencing data analysis.

550 Basecalling was performed using Guppy (v6.3.8) using the super-accurate basecalling config file with a  
551 Qscore threshold of 10. To identify NRG1 Isoforms we used IsoLamp v1.0  
552 (<https://github.com/ClarkLaboratory/IsoLamp>), a bash pipeline for the identification of known and novel  
553 isoforms from targeted amplicon long-read sequencing data generated with Oxford Nanopore  
554 technologies. Briefly, IsoLamp takes passed Nanopore reads and maps them to a reference genome  
555 using Minimap2 (Li, 2018). Alignments that are highly accurate (>95%), are full-length and have high  
556 accuracy splice junctions (>90%) are used for isoform discovery with bambu (v3.2.4). Isoform  
557 quantification is then performed with Salmon v0.14.2 (ref). IsoLamp was run in de novo mode setting  
558 BambuAnnotations=NULL. Each sample was run independently through the IsoLamp pipeline with  
559 'downsample reads' parameter set to FALSE. All other parameters were set to default. Isoform annotation  
560 files and count matrixes were visualized using IsoVis (<https://isomix.org/isovis>).

561

#### 562 Automated multiplex immunohistochemistry.

563 Formalin-fixed paraffin-embedded (FFPE) GBM tissue sections were stained using the Bond RX  
564 automated stainer (Leica Biosystems). Slides were deparaffinized in xylene followed by exposure to a  
565 graded series of ethanol solutions for rehydration. Heat-induced epitope retrieval was performed with  
566 either a Citrate pH 6 buffer or Tris Ethylenediaminetetraacetic acid (EDTA) pH 9 buffer. Slides were  
567 blocked with 3% hydrogen peroxide (H<sub>2</sub>O<sub>2</sub>) to block endogenous peroxidase activity. For multiplexed IHC  
568 staining the Opal 6-plex Detection Kit (Akoya Biosciences) was used. Serial multiplexing was performed  
569 by repeating the sequence of antigen retrieval, primary antibody, and Opal polymer incubation, followed  
570 by Opal fluorophore visualisation for all antibodies as follows. GBM tissue was stained with CD68 (Abcam  
571 ab955, 1:100), NRG1 ICD (Abcam ab191139, 1:200) and NRG1 EGF-like domain (ThermoFisher; MA4-  
572 12896, 1:100). Slides were incubated for 1 hour at room temperature with primary antibodies diluted in 1x  
573 Opal blocking/antibody diluent (Akoya biosciences). Slides were subsequently incubated with the Opal  
574 Polymer HRP Ms + Rb secondary polymer for 30 minutes prior to incubation with Opal fluorophores (Opal

575 520, 540, 570, 620, 650 and 690) diluted at 1:150 in 1x Plus Automation Amplification Diluent (Akoya  
 576 biosciences) for 10 minutes. Slides were counterstained with 10x Spectral DAPI and coverslipped with  
 577 ProLong Glass Antifade Mountant (Invitrogen). Multispectral images were acquired at 20x and 40x  
 578 magnification using Phenolmager™ HT (Akoya Biosciences). inForm 2.4.8 software (Akoya Biosciences)  
 579 was used for spectral deconvolution. Deconvoluted multispectral images were subsequently fused in  
 580 HALO (Indica Labs).

581 **Supplementary data**

582

A

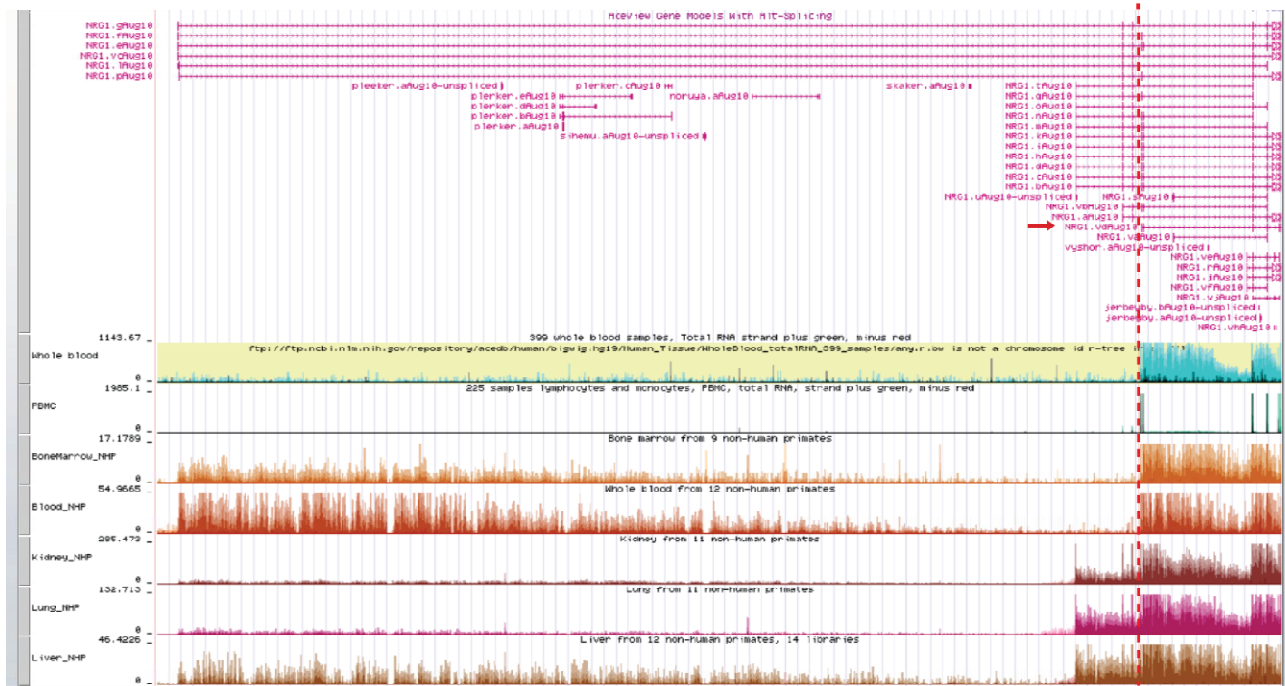

B

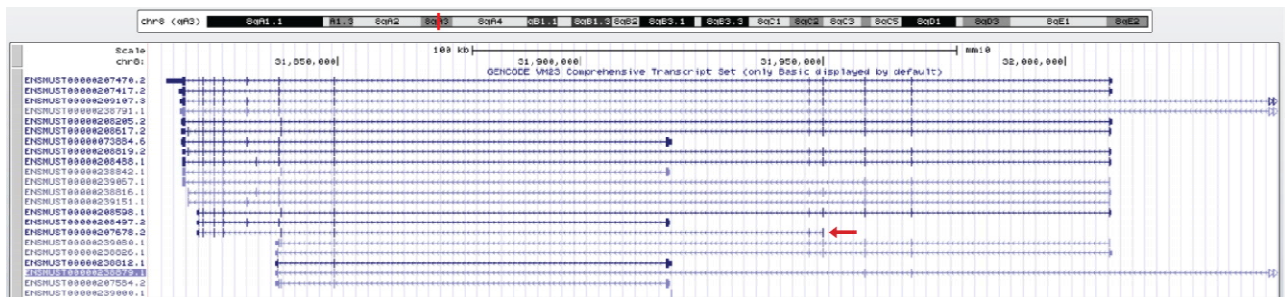

C

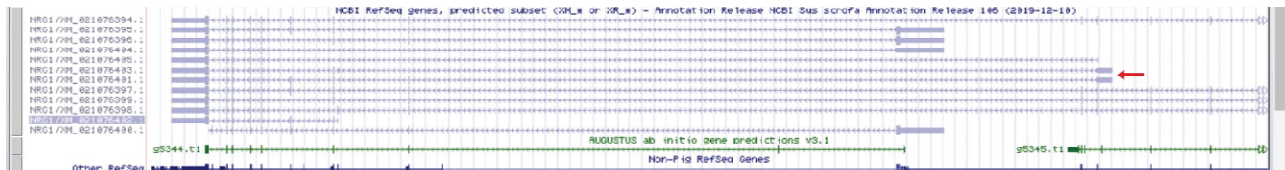

583  
 584  
 585

586 **Supplementary Figure 1. NRG1-VII TSS shows expression conservation in primate and non-**  
587 **primate mammals. A)** NRG1 expression profiles of human and non-human primates showing that TSS  
588 VII is conserved in bone marrow and whole blood **B)** Curated transcript in *Mus musculus* databases  
589 showing conservation of TSS VII in blood cells. **C)** Predicted transcript in *Sus scrofa* based ETSS derived  
590 from dendritic cells and other myeloid progenitor samples. Screenshot from <https://www.ncbi.nlm.nih.gov>.  
591 Accessed on 15/12/2022.

592  
593

**A**

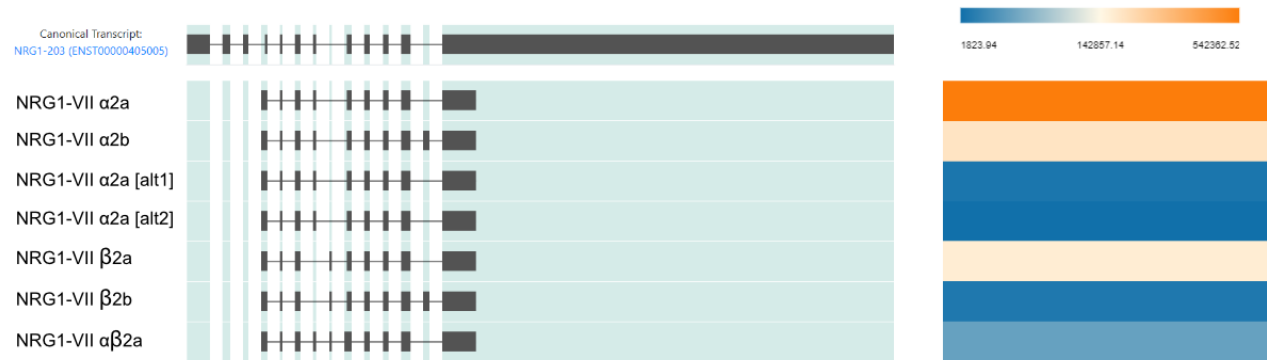

**B**

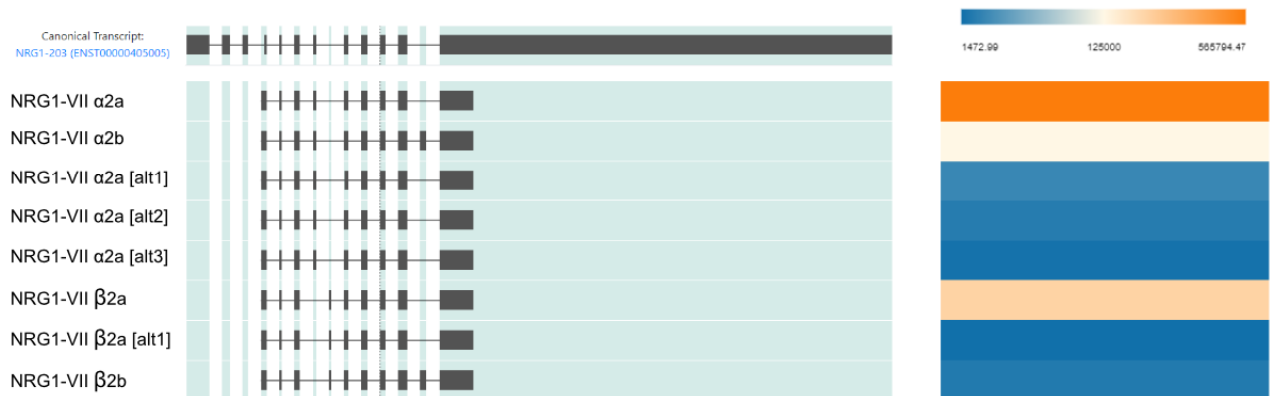

**C**

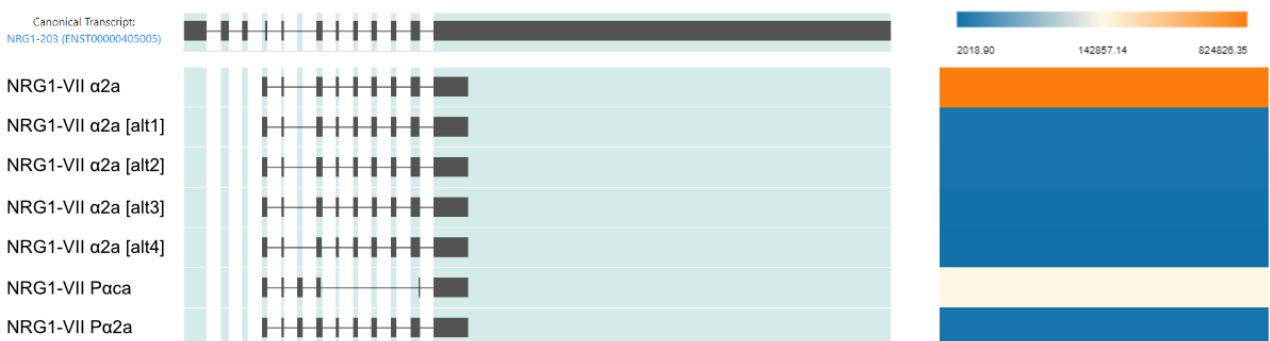

594 **Supplementary Figure 2. NRG1 long amplicon isoforms found through IsoLamp.** Each panel shows  
595 the IsoVis (Ref) view for NRG1 amplicons in a different sample. The initial row shows the canonical  
596 isoform structure chosen by Isomix. The rest show the resulting isoforms found by the IsoLamp analysis  
597 pipeline. Isoforms that include the term “[alt]” show isoforms that are only different to the main isoform in  
598 one of the splicing junctions by a few bases. The heat maps on the right-hand side describe relative  
599

600 abundance of each transcript in that sample in nTPM. Panels correspond to **A**) iPSC derived myeloid  
601 progenitors; **B**) iPSC derived macrophages (iMACs); **C**) Monocytes.

602  
603  
604  
605  
606  
607

**A**

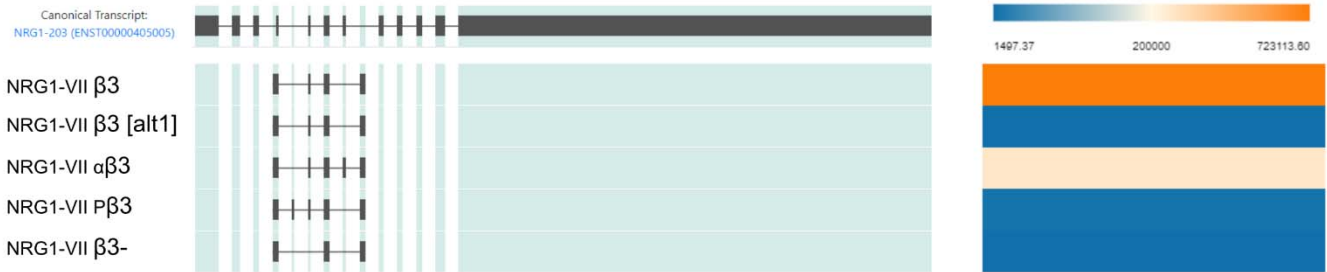

**B**

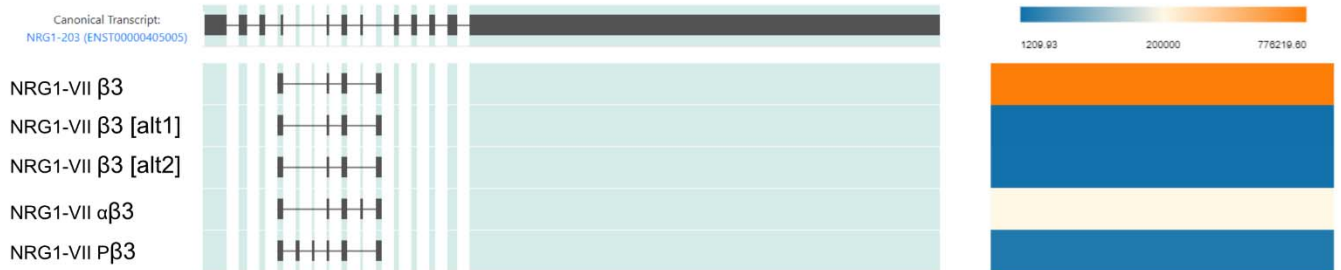

**C**

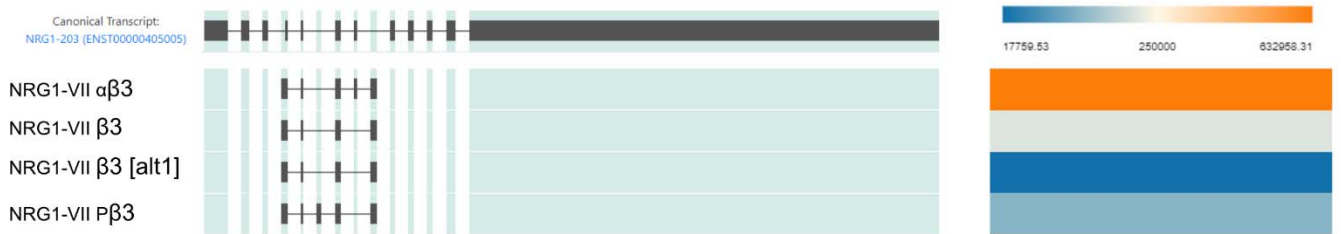

608  
609  
610  
611  
612  
613  
614  
615  
616  
617  
618  
619  
620  
621  
622  
623

**Supplementary Figure 3. NRG1 short amplicon isoforms found through IsoLamp.** Each panel shows the IsoVis (Ref) view for NRG1 amplicons in a different sample. The initial row shows the canonical isoform structure chosen by Isoform. The rest show the resulting isoforms found by the IsoLamp analysis pipeline. Isoforms that include the term “[alt]” show isoforms that are only different to the main isoform in one of the splicing junctions by a few bases. The heat maps on the right-hand side describe relative abundance of each transcript in that sample in nTPM. Panels correspond to **A**) iPSC derived myeloid progenitors; **B**) iPSC derived macrophages (iMACs); **C**) Monocytes. Different poison exons were detected for isoform NRG1-VII Pβ3 in each sample type, therefore further validation of these exons and isoform(s) is needed.

624  
625  
626

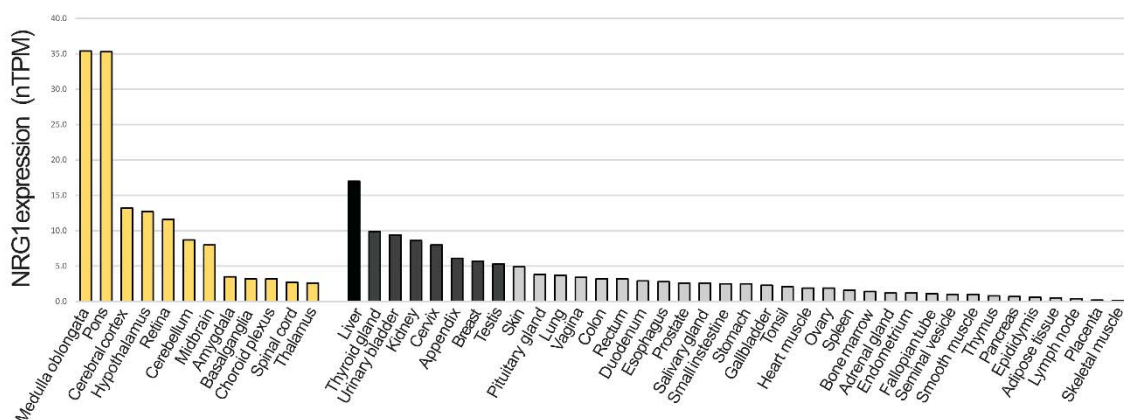

627  
628  
629  
630  
631  
632  
633  
634  
635  
636  
637  
638  
639  
640  
641  
642  
643  
644  
645  
646  
647  
648  
649  
650  
651  
652  
653  
654

**Supplementary Figure 4. NRG1 expression levels in macrophages present in a wide variety of human tissues.** Quantification of NRG1 mRNA expression in macrophages present in different human tissues according to The Human Protein Atlas (Karlsson et al., 2021). The y axis shows the number of transcripts per million. Yellow bars = neural tissue; Grey scale bars = levels of expression in all other tissues.



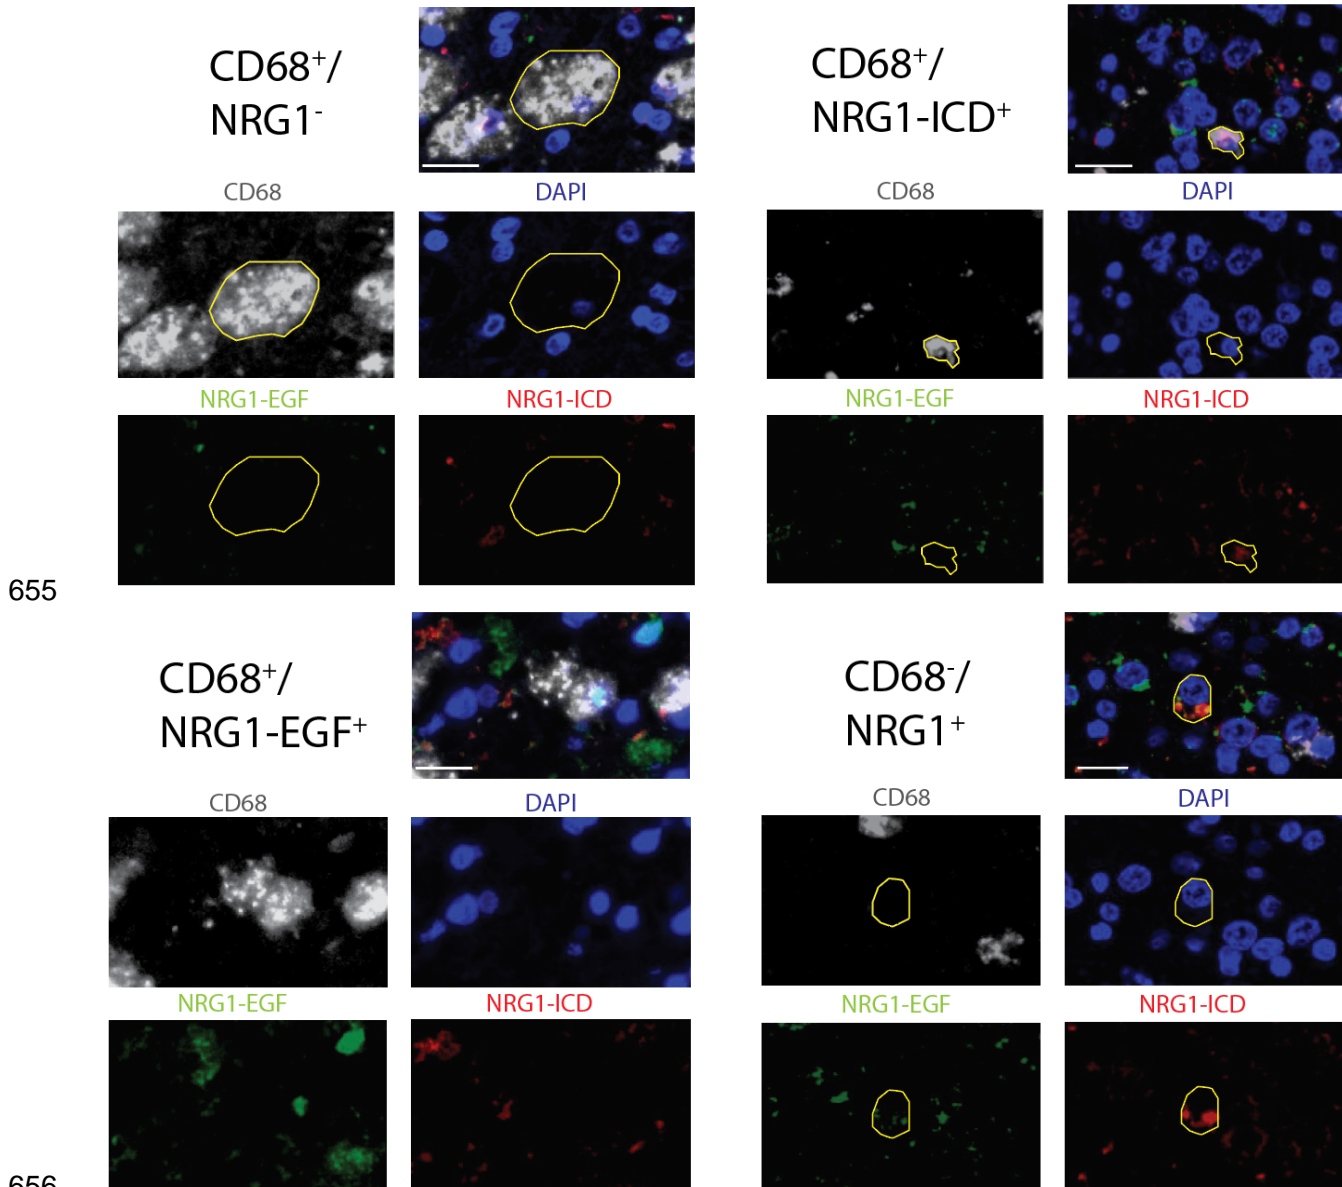

658 **Supplementary Figure 5. Panel of marker combinations present in GBM samples.** CD68<sup>+</sup> cells are  
659 diverse in their NRG1 expression patterns. Panels show CD68<sup>+</sup> cells that can be NRG1<sup>-</sup>, or positive for  
660 either of the NRG1 antibodies independently. CD68<sup>-</sup> cells were also observed to be positive for presence  
661 NRG1. Scale bars = 20  $\mu$ m.

662

663

### 664 Availability of data and materials

665

666 FAST5 and BAM files are available from ENA under accession PRJEB62796  
667 (<https://www.ebi.ac.uk/ena/browser/home>). The different NRG1-VII isoform sequences and expected  
668 proteins are available at NCBI under submission numbers OQ272754-OQ272776  
669 (<https://www.ncbi.nlm.nih.gov/>). The processed data and scripts used in this study are available at  
670 [https://github.com/wellslab/NRG1-VII\\_Amplicons](https://github.com/wellslab/NRG1-VII_Amplicons). IsoLamp is available on github at  
671 <https://github.com/ClarkLaboratory/IsoLamp>.

672



673  
674  
675  
676  
677  
678  
679  
680  
681  
682  
683  
684  
685  
686  
687  
688  
689  
690  
691  
692  
693  
694  
695  
696  
697  
698  
699  
700  
701  
702  
703  
704  
705  
706  
707  
708  
709  
710  
711  
712  
713  
714  
715  
716  
717  
718  
719  
720  
721  
722  
723  
724  
725  
726  
727

## REFERENCES:

- Alizadeh, A., Santhosh, K.T., Kataria, H., Gounni, A.S. & Karimi-Abdolrezaee, S. 2018, "Neuregulin-1 elicits a regulatory immune response following traumatic spinal cord injury", *Journal of neuroinflammation*, vol. 15, no. 1, pp. 1-21.
- Birchmeier, C. 2009, "ErbB receptors and the development of the nervous system", *Experimental cell research*, vol. 315, no. 4, pp. 611-618.
- Britsch, S., Li, L., Kirchhoff, S., Theuring, F., Brinkmann, V., Birchmeier, C. & Riethmacher, D. 1998, "The ErbB2 and ErbB3 receptors and their ligand, neuregulin-1, are essential for development of the sympathetic nervous system", *Genes & development*, vol. 12, no. 12, pp. 1825-1836.
- Brown, G.R., Hem, V., Katz, K.S., Ovetsky, M., Wallin, C., Ermolaeva, O., Tolstoy, I., Tatusova, T., Pruitt, K.D. & Maglott, D.R. 2015, "Gene: a gene-centered information resource at NCBI", *Nucleic acids research*, vol. 43, no. D1, pp. D36-D42.
- Buonanno, A. & Fischbach, G.D. 2001, "Neuregulin and ErbB receptor signaling pathways in the nervous system", *Current opinion in neurobiology*, vol. 11, no. 3, pp. 287-296.
- Carraway III, K.L., Weber, J.L., Unger, M.J., Ledesma, J., Yu, N., Gassmann, M. & Lai, C. 1997, "Neuregulin-2, a new ligand of ErbB3/ErbB4-receptor tyrosine kinases", *Nature*, vol. 387, no. 6632, pp. 512-516.
- Cheret, C., Willem, M., Fricker, F.R., Wende, H., Wulf-Goldenberg, A., Tahirovic, S., Nave, K., Saftig, P., Haass, C. & Garratt, A.N. 2013, "Bace1 and Neuregulin-1 cooperate to control formation and maintenance of muscle spindles", *The EMBO journal*, vol. 32, no. 14, pp. 2015-2028.
- Clark, M.B., Wrzesinski, T., Garcia, A.B., Hall, N.A., Kleinman, J.E., Hyde, T., Weinberger, D.R., Harrison, P.J., Haerty, W. & Tunbridge, E.M. 2020, "Long-read sequencing reveals the complex splicing profile of the psychiatric risk gene CACNA1C in human brain", *Molecular psychiatry*, vol. 25, no. 1, pp. 37-47.
- Craddock, N., O'Donovan, M.C. & Owen, M.J. 2005, "The genetics of schizophrenia and bipolar disorder: dissecting psychosis", *Journal of medical genetics*, vol. 42, no. 3, pp. 193-204.
- Falls, D.L. 2003, "Neuregulins: functions, forms, and signaling strategies", *The EGF Receptor Family*, pp. 15-31.
- FANTOM Consortium and the RIKEN PMI and CLST (DGT). A promoter-level mammalian expression atlas. *Nature* 507, 462–470 (2014).
- Frensing, T., Kaltschmidt, C. & Schmitt-John, T. 2008, "Characterization of a neuregulin-1 gene promoter: Positive regulation of type I isoforms by NF- $\kappa$ B", *Biochimica et Biophysica Acta (BBA)-Gene Regulatory Mechanisms*, vol. 1779, no. 2, pp. 139-144.
- Fleck, D., van Bebber, F., Colombo, A., Galante, C., Schwenk, B.M., Rabe, L., Hampel, H., Novak, B., Kremmer, E., Tahirovic, S. and Edbauer, D., 2013. Dual cleavage of neuregulin 1 type III by BACE1 and ADAM17 liberates its EGF-like domain and allows paracrine signaling. *Journal of Neuroscience*, 33(18), pp.7856-7869.
- Gantner, C.W., Hunt, C.P., Niclis, J.C., Penna, V., McDougall, S.J., Thompson, L.H. & Parish, C.L. 2021, "FGF-MAPK signaling regulates human deep-layer corticogenesis", *Stem cell reports*, vol. 16, no. 5, pp. 1262-1275.
- Garcia-Barcelo, M., Tang, C.S., Ngan, E.S., Lui, V.C., Chen, Y., So, M., Leon, T.Y., Miao, X., Shum, C.K. & Liu, F. 2009, "Genome-wide association study identifies NRG1 as a susceptibility locus for Hirschsprung's disease", *Proceedings of the National Academy of Sciences*, vol. 106, no. 8, pp. 2694-2699.
- Garratt, A.N., Britsch, S. & Birchmeier, C. 2000, "Neuregulin, a factor with many functions in the life of a schwann cell", *Bioessays*, vol. 22, no. 11, pp. 987-996.
- Garrido-Trigo, A., Corraliza, A., Veny, M., Dotti, I., Melon-Ardanz, E., Rill, A., Crowell, H.L., Corbi, A., Gudino, V. & Esteller, M. 2022, "Macrophage and neutrophil heterogeneity at single-cell spatial resolution in inflammatory bowel disease", bioRxiv.
- Georgieva, L., Dimitrova, A., Ivanov, D., Nikolov, I., Williams, N.M., Grozeva, D., Zaharieva, I., Toncheva, D., Owen, M.J. & Kirov, G. 2008, "Support for neuregulin 1 as a susceptibility gene for bipolar disorder and schizophrenia", *Biological psychiatry*, vol. 64, no. 5, pp. 419-427.

- 728 Go, R.C., Perry, R.T., Wiener, H., Bassett, S.S., Blacker, D., Devlin, B. & Sweet, R.A. 2005,  
729 "Neuregulin-1 polymorphism in late onset Alzheimer's disease families with psychoses", *American*  
730 *Journal of Medical Genetics Part B: Neuropsychiatric Genetics*, vol. 139, no. 1, pp. 28-32.
- 731 Gumà, A., Martínez-Redondo, V., López-Soldado, I., Cantó, C. & Zorzano, A. 2010, "Emerging role of  
732 neuregulin as a modulator of muscle metabolism", *American Journal of Physiology-Endocrinology*  
733 *and Metabolism*, vol. 298, no. 4, pp. E742-E750.
- 734 Haller, P.M., Gonçalves, I.F., Acar, E., Jäger, B., Pilz, P.M., Wojta, J., Huber, K., Kiss, A. & Podesser,  
735 B.K. 2022, "Relationship between plasma Neuregulin-1 and cardiac function in patients with ST-  
736 elevation myocardial infarction", *Reviews in Cardiovascular Medicine*, vol. 23, no. 2, pp. 63.
- 737 Harari, D., Tzahar, E., Romano, J., Shelly, M., Pierce, J., Andrews, G. & Yarden, Y. 1999, "Neuregulin-4:  
738 a novel growth factor that acts through the ErbB-4 receptor tyrosine kinase", *Oncogene*, vol. 18, no.  
739 17, pp. 2681-2689.
- 740 Jardé, T., Chan, W.H., Rossello, F.J., Kahlon, T.K., Theocharous, M., Arackal, T.K., Flores, T., Giraud,  
741 M., Richards, E. & Chan, E. 2020b, "Mesenchymal niche-derived neuregulin-1 drives intestinal stem  
742 cell proliferation and regeneration of damaged epithelium", *Cell Stem Cell*, vol. 27, no. 4, pp. 646-  
743 662. e7.
- 744 Joshi, K., Elso, C., Motazedian, A., Labonne, T., Schiesser, J.V., Cameron, F., Mannering, S.I., Elefanty,  
745 A.G. & Stanley, E.G. 2019, "Induced pluripotent stem cell macrophages present antigen to  
746 proinsulin-specific T cell receptors from donor-matched islet-infiltrating T cells in type 1 diabetes",  
747 *Diabetologia*, vol. 62, no. 12, pp. 2245-2251.
- 748 Jumper, N., Hodgkinson, T., Paus, R. & Bayat, A. 2017, "A Role for Neuregulin-1 in Promoting Keloid  
749 Fibroblast Migration via ErbB2-mediated Signaling.", *Acta Dermato-Venereologica*, vol. 97, no. 6.
- 750 Kao, T., Labonne, T., Niclis, J.C., Chaurasia, R., Lokmic, Z., Qian, E., Bruveris, F.F., Howden, S.E.,  
751 Motazedian, A. & Schiesser, J.V. 2016, "GAPTrap: a simple expression system for pluripotent stem  
752 cells and their derivatives", *Stem Cell Reports*, vol. 7, no. 3, pp. 518-526.
- 753 Karlsson, M., Zhang, C., Méar, L., Zhong, W., Digre, A., Katona, B., Sjöstedt, E., Butler, L., Odeberg, J. &  
754 Dusart, P. 2021a, "A single-cell type transcriptomics map of human tissues", *Science Advances*, vol.  
755 7, no. 31, pp. eabh2169.
- 756 Kilik, U., Yu, Q., Holtackers, R., Seimiya, M., dos Santos, Aline Xavier da Silveira, Treutlein, B., Spence,  
757 J.R. & Camp, J.G. 2021, "Maturation of human intestinal epithelium from pluripotency in vitro",  
758 *bioRxiv*.
- 759 Klemm, F., Maas, R.R., Bowman, R.L., Kornete, M., Soukup, K., Nassiri, S., Brouland, J., Iacobuzio-  
760 Donahue, C.A., Brennan, C. & Tabar, V. 2020, "Interrogation of the microenvironmental landscape in  
761 brain tumors reveals disease-specific alterations of immune cells", *Cell*, vol. 181, no. 7, pp. 1643-  
762 1660. e17.
- 763 Kramer, R., Bucay, N., Kane, D.J., Martin, L.E., Tarpley, J.E. & Theill, L.E. 1996, "Neuregulins with an Ig-  
764 like domain are essential for mouse myocardial and neuronal development", *Proceedings of the*  
765 *National Academy of Sciences of the United States of America*, vol. 93, no. 10, pp. 4833-4838.
- 766 Laskin, J., Liu, S., Tolba, K., Heining, C., Schlenk, R., Cheema, P., Cadranel, J., Jones, M., Drilon, A. &  
767 Cseh, A. 2020, "NRG1 fusion-driven tumors: biology, detection, and the therapeutic role of afatinib  
768 and other ErbB-targeting agents", *Annals of Oncology*, vol. 31, no. 12, pp. 1693-1703.
- 769 Li, H. 2018, "Minimap2: pairwise alignment for nucleotide sequences", *Bioinformatics*, vol. 34, no. 18, pp.  
770 3094-3100.
- 771 Li, H., Handsaker, B., Wysoker, A., Fennell, T., Ruan, J., Homer, N., Marth, G., Abecasis, G., Durbin, R. &  
772 1000 Genome Project Data Processing Subgroup 2009, "The Sequence Alignment/Map format and  
773 SAMtools", *Bioinformatics (Oxford, England)*, vol. 25, no. 16, pp. 2078-2079.
- 774 Liu, X., Bates, R., Yin, D.M., Shen, C., Wang, F., Su, N., Kirov, S.A., Luo, Y., Wang, J.Z., Xiong, W.C. &  
775 Mei, L. 2011, "Specific regulation of NRG1 isoform expression by neuronal activity", *The Journal of*  
776 *neuroscience: the official journal of the Society for Neuroscience*, vol. 31, no. 23, pp. 8491-8501.
- 777 Marballi, K., Cruz, D., Thompson, P. & Walss-Bass, C. 2012, "Differential neuregulin 1 cleavage in the  
778 prefrontal cortex and hippocampus in schizophrenia and bipolar disorder: preliminary findings", *PLoS*  
779 *one*, vol. 7, no. 5, pp. e36431.
- 780 Mei, L. & Xiong, W. 2008, "Neuregulin 1 in neural development, synaptic plasticity and schizophrenia",  
781 *Nature Reviews Neuroscience*, vol. 9, no. 6, pp. 437-452.
- 782 Nave, K. & Salzer, J.L. 2006, "Axonal regulation of myelination by neuregulin 1", *Current opinion in*  
783 *neurobiology*, vol. 16, no. 5, pp. 492-500.

- 784 NCBI Gene [Internet]. Bethesda (MD): National Library of Medicine (US), National Center for  
785 Biotechnology Information; 2004 – [2022, Aug, 10]. Available from:  
786 <https://www.ncbi.nlm.nih.gov/gene/3084>
- 787 Newbern, J. & Birchmeier, C. 2010, "Nrg1/ErbB signaling networks in Schwann cell development and  
788 myelination", *Seminars in cell & developmental biology* Elsevier, , pp. 922.
- 789 Ng, E.S., Davis, R., Stanley, E.G. & Elefanty, A.G. 2008, "A protocol describing the use of a recombinant  
790 protein-based, animal product-free medium (APEL) for human embryonic stem cell differentiation as  
791 spin embryoid bodies", *Nature protocols*, vol. 3, no. 5, pp. 768-776.
- 792 Niclis, J.C., Gantner, C.W., Alsanie, W.F., McDougall, S.J., Bye, C.R., Elefanty, A.G., Stanley, E.G.,  
793 Haynes, J.M., Pouton, C.W. & Thompson, L.H. 2017, "Efficiently specified ventral midbrain  
794 dopamine neurons from human pluripotent stem cells under xeno-free conditions restore motor  
795 deficits in parkinsonian rodents", *Stem cells translational medicine*, vol. 6, no. 3, pp. 937-948.
- 796 Pentassuglia, L. & Sawyer, D.B. 2009, "The role of Neuregulin-1 $\beta$ /ErbB signaling in the heart",  
797 *Experimental cell research*, vol. 315, no. 4, pp. 627-637.
- 798 Pfaffl, M.W., 2001. A new mathematical model for relative quantification in real-time RT-PCR. *Nucleic  
799 acids research*, 29(9), pp.e45-e45.
- 800 Pinkas-Kramarski, R., Shelly, M., Guarino, B.C., Wang, L.M., Lyass, L., Alroy, I., Alamandi, M., Kuo, A.,  
801 Moyer, J.D. & Lavi, S. 1998, "ErbB tyrosine kinases and the two neuregulin families constitute a  
802 ligand-receptor network", *Molecular and cellular biology*, vol. 18, no. 10, pp. 6090-6101.
- 803 Pipes, L., Li, S., Bozinovski, M., Palermo, R., Peng, X., Blood, P., Kelly, S., Weiss, J.M., Thierry-Mieg, J. &  
804 Thierry-Mieg, D. 2013, "The non-human primate reference transcriptome resource (NHPRT) for  
805 comparative functional genomics", *Nucleic acids research*, vol. 41, no. D1, pp. D906-D914.
- 806 Raajendiran, A., Ooi, G., Bayliss, J., O'Brien, P.E., Schittenhelm, R.B., Clark, A.K., Taylor, R.A.,  
807 Rodeheffer, M.S., Burton, P.R. & Watt, M.J. 2019, "Identification of metabolically distinct adipocyte  
808 progenitor cells in human adipose tissues", *Cell reports*, vol. 27, no. 5, pp. 1528-1540. e7.
- 809 Rajab, N., Angel, P.W., Deng, Y., Gu, J., Jameson, V., Kurowska-Stolarska, M., Milling, S., Pacheco,  
810 C.M., Rutar, M. & Laslett, A.L. 2021, "An integrated analysis of human myeloid cells identifies gaps  
811 in in vitro models of in vivo biology", *Stem cell reports*, vol. 16, no. 6, pp. 1629-1643.
- 812 Rajab, N., Gearing, L.J., Praver, Y.D., Angel, P.W., Grimmond, S.M., Laslett, A.L., Choi, J. & Wells, C.A.  
813 2022, "Proliferation is a driver of quorum sensing in an in vitro model of tissue resident  
814 macrophages", *bioRxiv*.
- 815 Robinson, J.T., Thorvaldsdóttir, H., Winckler, W., Guttman, M., Lander, E.S., Getz, G. & Mesirov, J.P.  
816 2011, "Integrative genomics viewer", *Nature biotechnology*, vol. 29, no. 1, pp. 24-26.
- 817 Ryzhov, S., Matafonov, A., Galindo, C.L., Zhang, Q., Tran, T., Lenihan, D.J., Lenneman, C.G., Feoktistov,  
818 I. & Sawyer, D.B. 2017, "ERBB signaling attenuates proinflammatory activation of nonclassical  
819 monocytes", *American Journal of Physiology-Heart and Circulatory Physiology*, vol. 312, no. 5, pp.  
820 H907-H918.
- 821 Samsa, L.A., Ito, C.E., Brown, D.R., Qian, L. & Liu, J. 2016, "IgG-containing isoforms of Neuregulin-1 are  
822 dispensable for cardiac trabeculation in zebrafish", *PLoS One*, vol. 11, no. 11, pp. e0166734.
- 823 Sheng, Q., Liu, X., Fleming, E., Yuan, K., Piao, H., Chen, J., Moustafa, Z., Thomas, R.K., Greulich, H. &  
824 Schinzel, A. 2010, "An activated ErbB3/NRG1 autocrine loop supports in vivo proliferation in ovarian  
825 cancer cells", *Cancer cell*, vol. 17, no. 3, pp. 298-310.
- 826 Sun, L., Cheng, B., Zhou, Y., Fan, Y., Li, W., Qiu, Q., Fang, Y., Xiao, S., Zheng, H. & Li, X. 2020, "ErbB4  
827 mutation that decreased NRG1-ErbB4 signaling involved in the pathogenesis of amyotrophic lateral  
828 sclerosis/frontotemporal dementia", *Journal of Alzheimer's Disease*, vol. 74, no. 2, pp. 535-544.
- 829 Sweeney, C., Lai, C., Riese, D.J., 2nd, Diamonti, A.J., Cantley, L.C. & Carraway, K.L., 3rd 2000, "Ligand  
830 discrimination in signaling through an ErbB4 receptor homodimer", *The Journal of biological  
831 chemistry*, vol. 275, no. 26, pp. 19803-19807.
- 832 Tang, C.S., Ngan, E.S., Tang, W., So, M., Cheng, G., Miao, X., Leon, T.Y., Leung, B.M., Hui, K.W. & Lui,  
833 V.H. 2012, "Mutations in the NRG1 gene are associated with Hirschsprung disease", *Human  
834 genetics*, vol. 131, no. 1, pp. 67-76.
- 835 Vlahos, K., Sourris, K., Mayberry, R., McDonald, P., Bruveris, F.F., Schiesser, J.V., Bozaoglu, K.,  
836 Lockhart, P.J., Stanley, E.G. & Elefanty, A.G. 2019, "Generation of iPSC lines from peripheral blood  
837 mononuclear cells from 5 healthy adults", *Stem Cell Research*, vol. 34, pp. 101380.

- 838 Wagner, M. & Siddiqui, M. 2007, "Signal transduction in early heart development (II): ventricular chamber  
839 specification, trabeculation, and heart valve formation", *Experimental biology and medicine*, vol. 232,  
840 no. 7, pp. 866-880.
- 841 Warren CM, Kani K, Landgraf R. The N-terminal domains of neuregulin 1 confer signal attenuation. *J Biol*  
842 *Chem.* 2006;281(37):27306-27316.
- 843 Wen, D., Suggs, S.V., Karunagaran, D., Liu, N., Cupples, R.L., Luo, Y., Janssen, A.M., Ben-Baruch, N.,  
844 Trollinger, D.B. & Jacobsen, V.L. 1994, "Structural and functional aspects of the multiplicity of Neu  
845 differentiation factors", *Molecular and cellular biology*, vol. 14, no. 3, pp. 1909-1919.
- 846 Wolpowitz, D., Mason, T.B., Dietrich, P., Mendelsohn, M., Talmage, D.A. & Role, L.W. 2000, "Cysteine-  
847 rich domain isoforms of the neuregulin-1 gene are required for maintenance of peripheral synapses",  
848 *Neuron*, vol. 25, no. 1, pp. 79-91.
- 849 Yu, Q., Kilik, U., Holloway, E.M., Tsai, Y., Harmel, C., Wu, A., Wu, J.H., Czerwinski, M., Childs, C.J. & He,  
850 Z. 2021, "Charting human development using a multi-endodermal organ atlas and organoid models",  
851 *Cell*, vol. 184, no. 12, pp. 3281-3298. e22.
- 852 Zhang, C., Mei, W. & Zeng, C. 2022, "Oncogenic Neuregulin 1 gene (NRG1) fusions in cancer: A  
853 potential new therapeutic opportunities", *Biochimica et Biophysica Acta (BBA)-Reviews on Cancer*,  
854 pp. 188707.
- 855 Zhang, D., Sliwkowski, M.X., Mark, M., Frantz, G., Akita, R., Sun, Y., Hillan, K., Crowley, C., Brush, J. &  
856 Godowski, P.J. 1997, "Neuregulin-3 (NRG3): a novel neural tissue-enriched protein that binds and  
857 activates ErbB4", *Proceedings of the National Academy of Sciences*, vol. 94, no. 18, pp. 9562-9567.
- 858 Zhang, P., Kuang, H., He, Y., Idiga, S.O., Li, S., Chen, Z., Yang, Z., Cai, X., Zhang, K., Potthoff, M.J., Xu,  
859 Y. & Lin, J.D. 2018, "NRG1-Fc improves metabolic health via dual hepatic and central action", *JCI*  
860 *insight*, vol. 3, no. 5, pp. 10.1172/jci.insight.98522.

861  
862

### 863 **Authorship contributions**

864 Conceptualization MABR, CAW, Data curation MABR, RDP, YDJP, Formal analysis MABR, RDP, YDJP,  
865 Funding acquisition CAW, MBC, Investigation MABR, CAW, Methodology MABR, RDP, YDJP, MD, SSW,  
866 JG, WD, NR, AL, JH, Project administration CAW, Resources CAW, MBC, TM, Software MABR, RDP,  
867 YDJP, JG Supervision CAW, MBC, Validation MABR, RDP, YDJP, MD, SSW, Visualization MABR, MD,  
868 SSW, writing original draft MABR, Writing – review and editing MABR, RDP, YDJP, MD, SSW, WD, NR,  
869 AL, TM, MBC, CAW.

870

### 871 **Funding sources**

872 MABR is funded by a University of Melbourne Research Scholarship. MD is supported by the Australian  
873 Government Research Training Program Scholarship. MBC is supported by an NHMRC Investigator  
874 Fellowship (APP11968410). The project was supported by NHMRC Synergy grant APP 1186371 to CAW.

875

### 876 **Conflicts of Interest**

877 YDJP, RDP and MBC have received support from Oxford Nanopore Technologies (ONT) to present their  
878 findings at scientific conferences. However, ONT played no role in study design, execution, analysis or  
879 publication. No conflicts are declared for MABR, MD, SSW, NR, WDN, TM or CAW.

880

### 881 **Acknowledgements.**

882 The authors thank Professor Matt Watt (Department of Anatomy and Physiology, University of  
883 Melbourne), for gifting adipose tissue samples. The authors thanks Dr Le Christy Ying and Prof Paul  
884 Hertzog (Hudson Institute, Clayton, Melbourne) for gifting 2D macrophage RNA for this study. The  
885 authors thank Mrs Zahra Elahi (Department of Anatomy and Physiology, University of Melbourne) for her  
886 logistic and emotional support, crucial to this study. The authors thank Mr Yidi Deng (Department of  
887 Maths and Statistics, University of Melbourne) for discussions about statistical approaches.

888

889 **Sequence Accessions:** All mRNA sequences have been deposited at NCBI GenBank nucleotide  
890 database, Accessions assigned 18/1/23: OQ272754, OQ272755, OQ272756, OQ272757, OQ272758,  
891 OQ272759, OQ272760, OQ272761, OQ272762, OQ272763, OQ272764, OQ272765, OQ272766,

892 OQ272767, OQ272768, OQ272769, OQ272770, OQ272771, OQ272772, OQ272773, OQ272774,  
893 OQ272775, OQ272776.  
894
